# Supplementary material for: The Impact of User Personality Traits on Word of Mouth: Text-Mining Social Media Platforms
Source: Atypon-hosted journal article supplement (doi:10.1287/isre.2017.0768), 2018-05-14
Supplement: isre.2017.0768-sm.pdf [file isre.2017.0768-sm.pdf]

# Appendix

**Table A1: Parametric Survival Analysis (Personality Similarity)**

|                                                                   | Model 1               | Model 2               | Model 3               | Model 4               | Model 5               | Model 6               | Model 7               | Model 8               |
|-------------------------------------------------------------------|-----------------------|-----------------------|-----------------------|-----------------------|-----------------------|-----------------------|-----------------------|-----------------------|
| User similarity                                                   | 1.0991***<br>(0.0043) | 1.1002***<br>(0.0043) | 1.0972***<br>(0.0044) | 1.0950***<br>(0.0044) | 1.2977***<br>(0.0217) | 1.2957***<br>(0.0217) | 1.2981***<br>(0.0214) | 1.2805***<br>(0.0211) |
| Reciprocal relationship                                           | 7.6938***<br>(0.3612) | 7.7152***<br>(0.3626) | 7.0719***<br>(0.3342) | 7.1289***<br>(0.3368) | 7.2361***<br>(0.3210) | 7.2109***<br>(0.3199) | 7.2519***<br>(0.3225) | 6.6094***<br>(0.3022) |
| # Peer-to-Peer interactions                                       | 1.0008<br>(0.0008)    | 1.0009<br>(0.0008)    | 1.0006<br>(0.0009)    | 1.0006<br>(0.0009)    | 1.0006<br>(0.0008)    | 1.0006<br>(0.0009)    | 1.0007<br>(0.0008)    | 1.0004<br>(0.0009)    |
| Sentiment of message                                              | 1.6331***<br>(0.1090) | 1.6324***<br>(0.1090) | 1.5529***<br>(0.1023) | 1.6077***<br>(0.1070) | 1.6703***<br>(0.1050) | 1.6456***<br>(0.1038) | 1.5793***<br>(0.0998) | 1.4622***<br>(0.0957) |
| Personalized message                                              | 1.1117***<br>(0.0052) | 1.1121***<br>(0.0052) | 1.1113***<br>(0.0052) | 1.1091***<br>(0.0052) | 1.0572***<br>(0.0039) | 1.0553***<br>(0.0039) | 1.0492***<br>(0.0052) | 1.0393***<br>(0.0053) |
| User expertise (Sender)                                           | 1.2572***<br>(0.0292) | 1.2538***<br>(0.0293) | 1.2693***<br>(0.0297) | 1.2765***<br>(0.0299) | 1.2040***<br>(0.0257) | 1.1953***<br>(0.0255) | 1.2196***<br>(0.0262) | 1.2003***<br>(0.0267) |
| User leadership (Sender)                                          | 1.0140***<br>(0.0017) | 1.0140***<br>(0.0017) | 1.0112***<br>(0.0017) | 1.0111***<br>(0.0017) | 1.0100***<br>(0.0018) | 1.0101***<br>(0.0018) | 1.0102***<br>(0.0018) | 1.0049**<br>(0.0018)  |
| Personality similarity (Main personality type)                    |                       | 0.9406<br>(0.0448)    |                       |                       |                       |                       |                       |                       |
| Personality similarity                                            |                       |                       | 1.4882***<br>(0.0486) |                       |                       |                       |                       |                       |
| Personality similarity (Agreeableness)                            |                       |                       |                       | 1.1108*<br>(0.0496)   | 1.4686***<br>(0.1145) | 1.4672***<br>(0.1145) | 1.4507***<br>(0.1141) | 1.4451***<br>(0.1136) |
| Personality similarity (Conscientiousness)                        |                       |                       |                       | 1.0705<br>(0.0401)    | 0.9679<br>(0.0473)    | 0.9728<br>(0.0475)    | 0.9865<br>(0.0483)    | 1.0111<br>(0.0492)    |
| Personality similarity (Extraversion)                             |                       |                       |                       | 1.3094***<br>(0.0617) | 0.9807<br>(0.0660)    | 0.9696<br>(0.0655)    | 0.9322<br>(0.0637)    | 0.9050<br>(0.0623)    |
| Personality similarity (Emotional range)                          |                       |                       |                       | 1.0436<br>(0.0418)    | 1.0060<br>(0.0398)    | 1.0030<br>(0.0398)    | 1.0142<br>(0.0404)    | 1.0121<br>(0.0405)    |
| Personality similarity (Openness)                                 |                       |                       |                       | 1.0499<br>(0.0461)    | 0.9087<br>(0.0654)    | 0.9056<br>(0.0651)    | 0.9319<br>(0.0665)    | 0.9166<br>(0.0651)    |
| Visible message=1                                                 |                       |                       |                       |                       | 1.3235***<br>(0.0959) | 1.2444**<br>(0.0912)  | 1.1899*<br>(0.0874)   | 1.4537***<br>(0.1090) |
| Visible message=1 x<br>Personality similarity (Agreeableness)     |                       |                       |                       |                       | 0.7597**<br>(0.0680)  | 0.7704**<br>(0.0689)  | 0.7722**<br>(0.0694)  | 0.7608**<br>(0.0687)  |
| Visible message=1 x<br>Personality similarity (Conscientiousness) |                       |                       |                       |                       | 1.0898<br>(0.0668)    | 1.0875<br>(0.0666)    | 1.0716<br>(0.0661)    | 1.0180<br>(0.0627)    |
| Visible message=1 x<br>Personality similarity (Extraversion)      |                       |                       |                       |                       | 1.3448***<br>(0.1102) | 1.3432***<br>(0.1102) | 1.3897***<br>(0.1150) | 1.4452***<br>(0.1209) |
| Visible message=1 x<br>Personality similarity (Emotional range)   |                       |                       |                       |                       | 1.0007<br>(0.0559)    | 1.0006<br>(0.0560)    | 0.9942<br>(0.0559)    | 1.0302<br>(0.0580)    |
| Visible message=1 x<br>Personality similarity (Openness)          |                       |                       |                       |                       | 1.1933*<br>(0.1006)   | 1.2032*<br>(0.1014)   | 1.1578<br>(0.0971)    | 1.1739<br>(0.0981)    |
| Sender\Recipient popularity controls                              | Yes                   |
| Message controls                                                  | No                    | No                    | No                    | No                    | No                    | Yes                   | Yes                   | Yes                   |
| Product controls                                                  | No                    | No                    | No                    | No                    | No                    | No                    | Yes                   | Yes                   |
| Additional Sender\Recipient controls                              | No                    | Yes                   |
| Log-likelihood                                                    | -21600.1              | -21599.2              | -21516.8              | -21521.7              | -28189.6              | -28175.8              | -28149.1              | -27949.6              |
| BIC                                                               | 43331.44              | 43341.71              | 43176.77              | 43234.31              | 56659.98              | 56644.49              | 56627.75              | 56338.58              |
| AIC                                                               | 43222.14              | 43222.47              | 43057.53              | 43075.32              | 56425.29              | 56399.6               | 56352.25              | 55971.24              |
| chi2                                                              | 3677.905              | 3679.571              | 3844.516              | 3834.722              | 4218.527              | 4246.219              | 4299.572              | 4698.585              |
| p                                                                 | 0.0000                | 0.0000                | 0.0000                | 0.0000                | 0.0000                | 0.0000                | 0.0000                | 0.0000                |
| N                                                                 | 152730                | 152730                | 152730                | 152730                | 199563                | 199563                | 199563                | 199563                |

Note: Parametric survival analysis proportional hazards model of log relative-hazard form. The hazard ratios (HRs) represent the percent increase (HR > 1) or decrease (HR < 1) in post-purchase hazards associated with each attribute. Significance levels: \* p<0.05, \*\* p<0.01, \*\*\* p<0.001



|                                                       |          |          |          |          |          |                       |
|-------------------------------------------------------|----------|----------|----------|----------|----------|-----------------------|
| High Openness (Sender) x<br>Low Openness (Recipient)  |          |          |          |          |          | (0.2775)              |
| High Openness (Sender) x<br>High Openness (Recipient) |          |          |          |          |          | 1.3699***<br>(0.1071) |
| Visible message=1                                     | 1.1899*  |          |          |          |          | (0.0874)              |
| Sender\Recipient controls                             | Yes      | Yes      | Yes      | Yes      | Yes      | Yes                   |
| Message controls                                      | Yes      | Yes      | Yes      | Yes      | Yes      | Yes                   |
| Product controls                                      | Yes      | Yes      | Yes      | Yes      | Yes      | Yes                   |
| Log-likelihood                                        | -28149.1 | -28111.1 | -28093.4 | -28077.6 | -28005.6 | -28109                |
| BIC                                                   | 56627.75 | 56588.33 | 56552.97 | 56521.3  | 56377.34 | 56584.19              |
| AIC                                                   | 56352.25 | 56282.22 | 56246.85 | 56215.18 | 56071.22 | 56278.07              |
| chi2                                                  | 4299.572 | 4375.603 | 4410.972 | 4442.641 | 4586.601 | 4379.747              |
| p                                                     | 0.0000   | 0.0000   | 0.0000   | 0.0000   | 0.0000   | 0.0000                |
| N                                                     | 199563   | 199563   | 199563   | 199563   | 199563   | 199563                |

Note: Parametric survival analysis proportional hazards model of log relative-hazard form. The hazard ratios (HRs) represent the percent increase (HR > 1) or decrease (HR < 1) in post-purchase hazards associated with each attribute. The baseline case for Models (2)-(6) represents dyads in which the WOM message was not visible. Significance levels: \* p<0.05, \*\* p<0.01, \*\*\* p<0.001

**Table A3: Survival Analysis (Personality Similarity with Possibly Correlated Observations)**

|                                                                   | Model 1               | Model 2               | Model 3               | Model 4               | Model 5               | Model 6               | Model 7               | Model 8               |
|-------------------------------------------------------------------|-----------------------|-----------------------|-----------------------|-----------------------|-----------------------|-----------------------|-----------------------|-----------------------|
| User similarity                                                   | 1.0994***<br>(0.0134) | 1.1003***<br>(0.0136) | 1.0974***<br>(0.0134) | 1.0953***<br>(0.0132) | 1.2962***<br>(0.0254) | 1.2942***<br>(0.0253) | 1.2967***<br>(0.0266) | 1.2797***<br>(0.0270) |
| Reciprocal relationship                                           | 7.3565***<br>(0.4797) | 7.3720***<br>(0.4830) | 6.7628***<br>(0.4429) | 6.8198***<br>(0.4453) | 6.9464***<br>(0.4649) | 6.9192***<br>(0.4633) | 6.9508***<br>(0.4686) | 6.3147***<br>(0.4468) |
| # Peer-to-Peer interactions                                       | 1.0008<br>(0.0010)    | 1.0009<br>(0.0009)    | 1.0006<br>(0.0010)    | 1.0006<br>(0.0010)    | 1.0006<br>(0.0010)    | 1.0006<br>(0.0010)    | 1.0008<br>(0.0010)    | 1.0005<br>(0.0011)    |
| Sentiment of message                                              | 1.6083***<br>(0.1158) | 1.6077***<br>(0.1158) | 1.5281***<br>(0.1070) | 1.5825***<br>(0.1119) | 1.6483***<br>(0.1079) | 1.6242***<br>(0.1065) | 1.5613***<br>(0.1024) | 1.4458***<br>(0.0962) |
| Personalized message                                              | 1.1084***<br>(0.0048) | 1.1088***<br>(0.0049) | 1.1079***<br>(0.0049) | 1.1057***<br>(0.0050) | 1.0559***<br>(0.0038) | 1.0540***<br>(0.0038) | 1.0486***<br>(0.0048) | 1.0387***<br>(0.0049) |
| User expertise (Sender)                                           | 1.2499***<br>(0.0371) | 1.2471***<br>(0.0369) | 1.2616***<br>(0.0380) | 1.2690***<br>(0.0383) | 1.2000***<br>(0.0329) | 1.1917***<br>(0.0325) | 1.2148***<br>(0.0340) | 1.1957***<br>(0.0337) |
| User leadership (Sender)                                          | 1.0138***<br>(0.0018) | 1.0138***<br>(0.0018) | 1.0110***<br>(0.0018) | 1.0108***<br>(0.0018) | 1.0098***<br>(0.0019) | 1.0099***<br>(0.0019) | 1.0100***<br>(0.0020) | 1.0048*<br>(0.0019)   |
| Personality similarity (Main personality type)                    |                       | 0.9506<br>(0.0539)    |                       |                       |                       |                       |                       |                       |
| Personality similarity                                            |                       |                       | 1.4758***<br>(0.0627) |                       |                       |                       |                       |                       |
| Personality similarity (Agreeableness)                            |                       |                       |                       | 1.1074*<br>(0.0535)   | 1.4608***<br>(0.0993) | 1.4591***<br>(0.0994) | 1.4427***<br>(0.0997) | 1.4369***<br>(0.0991) |
| Personality similarity (Conscientiousness)                        |                       |                       |                       | 1.0681<br>(0.0448)    | 0.9697<br>(0.0481)    | 0.9746<br>(0.0482)    | 0.9876<br>(0.0489)    | 1.0121<br>(0.0497)    |
| Personality similarity (Extraversion)                             |                       |                       |                       | 1.3087***<br>(0.0698) | 0.9761<br>(0.0579)    | 0.9649<br>(0.0576)    | 0.9280<br>(0.0555)    | 0.9005<br>(0.0539)    |
| Personality similarity (Emotional range)                          |                       |                       |                       | 1.0400<br>(0.0498)    | 1.0061<br>(0.0358)    | 1.0031<br>(0.0359)    | 1.0143<br>(0.0364)    | 1.0123<br>(0.0367)    |
| Personality similarity (Openness)                                 |                       |                       |                       | 1.0486<br>(0.0537)    | 0.9115<br>(0.0629)    | 0.9084<br>(0.0626)    | 0.9348<br>(0.0633)    | 0.9199<br>(0.0613)    |
| Visible message=1                                                 |                       |                       |                       |                       | 1.3100**<br>(0.1153)  | 1.2334*<br>(0.1087)   | 1.1818<br>(0.1020)    | 1.4369***<br>(0.1230) |
| Visible message=1 x<br>Personality similarity (Agreeableness)     |                       |                       |                       |                       | 0.7616***<br>(0.0603) | 0.7720**<br>(0.0609)  | 0.7735**<br>(0.0616)  | 0.7633***<br>(0.0609) |
| Visible message=1 x<br>Personality similarity (Conscientiousness) |                       |                       |                       |                       | 1.0860<br>(0.0708)    | 1.0834<br>(0.0704)    | 1.0690<br>(0.0703)    | 1.0165<br>(0.0667)    |
| Visible message=1 x<br>Personality similarity (Extraversion)      |                       |                       |                       |                       | 1.3490***<br>(0.1023) | 1.3487***<br>(0.1024) | 1.3952***<br>(0.1062) | 1.4503***<br>(0.1106) |
| Visible message=1 x<br>Personality similarity (Emotional range)   |                       |                       |                       |                       | 0.9993<br>(0.0572)    | 0.9992<br>(0.0574)    | 0.9925<br>(0.0573)    | 1.0272<br>(0.0593)    |
| Visible message=1 x<br>Personality similarity (Openness)          |                       |                       |                       |                       | 1.1875*<br>(0.0977)   | 1.1970*<br>(0.0986)   | 1.1526<br>(0.0943)    | 1.1657<br>(0.0946)    |
| Sender\Recipient popularity controls                              | Yes                   |
| Message controls                                                  | No                    | No                    | No                    | No                    | No                    | Yes                   | Yes                   | Yes                   |
| Product controls                                                  | No                    | No                    | No                    | No                    | No                    | No                    | Yes                   | Yes                   |
| Additional Sender\Recipient controls                              | No                    | Yes                   |
| Log-likelihood                                                    | -23726.8              | -23726.3              | -23646.8              | -23650.8              | -31823.7              | -31810.8              | -31785.2              | -31592.7              |
| BIC                                                               | 47573.06              | 47583.85              | 47424.87              | 47480.72              | 63915.88              | 63902.27              | 63887.75              | 63612.58              |
| AIC                                                               | 47473.69              | 47474.55              | 47315.56              | 47331.67              | 63691.39              | 63667.58              | 63622.45              | 63255.45              |
| chi2                                                              | 2459.884              | 2525.988              | 2469.142              | 2643.004              | 2483.971              | 2644.359              | 2807.676              | 3230.129              |
| p                                                                 | 0.0000                | 0.0000                | 0.0000                | 0.0000                | 0.0000                | 0.0000                | 0.0000                | 0.0000                |
| N                                                                 | 152730                | 152730                | 152730                | 152730                | 199563                | 199563                | 199563                | 199563                |

Note: Semiparametric survival analysis with Cox proportional hazards model adjusting for possibly correlated observations. The hazard ratios (HRs) represent the percent increase (HR > 1) or decrease (HR < 1) in post-purchase hazards associated with each attribute. Significance levels: \* p<0.05, \*\* p<0.01, \*\*\* p<0.001

**Table A4: Survival Analysis (Personality Characteristics with Possibly Correlated Observations)**

|                                                                         | Model 1               | Model 2               | Model 3               | Model 4               | Model 5               | Model 6               |
|-------------------------------------------------------------------------|-----------------------|-----------------------|-----------------------|-----------------------|-----------------------|-----------------------|
| Personality similarity (Agreeableness)                                  | 1.4427***<br>(0.0997) |                       | 1.3810***<br>(0.0939) | 1.3232***<br>(0.0911) | 1.4276***<br>(0.1016) | 1.5220***<br>(0.1017) |
| Personality similarity (Conscientiousness)                              | 0.9876<br>(0.0489)    | 1.1021*<br>(0.0538)   |                       | 1.0379<br>(0.0504)    | 1.1335**<br>(0.0510)  | 1.0336<br>(0.0465)    |
| Personality similarity (Extraversion)                                   | 0.9280<br>(0.0555)    | 1.0526<br>(0.0746)    | 0.9217<br>(0.0567)    |                       | 0.8069***<br>(0.0485) | 0.9515<br>(0.0601)    |
| Personality similarity (Emotional range)                                | 1.0143<br>(0.0364)    | 1.0710<br>(0.0445)    | 1.0852*<br>(0.0431)   | 0.9787<br>(0.0366)    |                       | 0.9562<br>(0.0383)    |
| Personality similarity (Openness)                                       | 0.9348<br>(0.0633)    | 1.0941<br>(0.0750)    | 1.0107<br>(0.0636)    | 0.8564*<br>(0.0556)   | 0.9707<br>(0.0601)    |                       |
| Visible message=1 x<br>Personality similarity (Agreeableness)           | 0.7735**<br>(0.0616)  |                       | 0.7669**<br>(0.0618)  | 0.8583<br>(0.0680)    | 0.7470***<br>(0.0630) | 0.7316***<br>(0.0572) |
| Visible message=1 x<br>Personality similarity (Conscientiousness)       | 1.0690<br>(0.0703)    | 0.9832<br>(0.0645)    |                       | 1.0234<br>(0.0673)    | 1.0106<br>(0.0545)    | 1.0274<br>(0.0643)    |
| Visible message=1 x<br>Personality similarity (Extraversion)            | 1.3952***<br>(0.1062) | 1.1737<br>(0.0998)    | 1.4223***<br>(0.1116) |                       | 1.5592***<br>(0.1198) | 1.3837***<br>(0.1072) |
| Visible message=1 x<br>Personality similarity (Emotional range)         | 0.9925<br>(0.0573)    | 0.9241<br>(0.0573)    | 0.9852<br>(0.0527)    | 1.0302<br>(0.0606)    |                       | 1.0348<br>(0.0597)    |
| Visible message=1 x<br>Personality similarity (Openness)                | 1.1526<br>(0.0943)    | 0.9637<br>(0.0842)    | 1.0880<br>(0.0866)    | 1.1923*<br>(0.0956)   | 1.1559<br>(0.0924)    |                       |
| Low Agreeableness (Sender) x<br>Low Agreeableness (Recipient)           |                       | 0.6159***<br>(0.0592) |                       |                       |                       |                       |
| Low Agreeableness (Sender) x<br>High Agreeableness (Recipient)          |                       | 0.5593***<br>(0.0744) |                       |                       |                       |                       |
| High Agreeableness (Sender) x<br>Low Agreeableness (Recipient)          |                       | 1.3050*<br>(0.1523)   |                       |                       |                       |                       |
| High Agreeableness (Sender) x<br>High Agreeableness (Recipient)         |                       | 1.0843<br>(0.1724)    |                       |                       |                       |                       |
| Low Conscientiousness (Sender) x<br>Low Conscientiousness (Recipient)   |                       |                       | 0.6902<br>(0.1316)    |                       |                       |                       |
| Low Conscientiousness (Sender) x<br>High Conscientiousness (Recipient)  |                       |                       | 0.9953<br>(0.1078)    |                       |                       |                       |
| High Conscientiousness (Sender) x<br>Low Conscientiousness (Recipient)  |                       |                       | 1.6170**<br>(0.2575)  |                       |                       |                       |
| High Conscientiousness (Sender) x<br>High Conscientiousness (Recipient) |                       |                       | 1.7278***<br>(0.1679) |                       |                       |                       |
| Low Extraversion (Sender) x<br>Low Extraversion (Recipient)             |                       |                       |                       | 1.1884*<br>(0.0973)   |                       |                       |
| Low Extraversion (Sender) x<br>High Extraversion (Recipient)            |                       |                       |                       | 0.5808**<br>(0.1136)  |                       |                       |
| High Extraversion (Sender) x<br>Low Extraversion (Recipient)            |                       |                       |                       | 1.7128***<br>(0.2024) |                       |                       |
| High Extraversion (Sender) x<br>High Extraversion (Recipient)           |                       |                       |                       | 0.9471<br>(0.2151)    |                       |                       |
| Low Emotional range (Sender) x<br>Low Emotional range (Recipient)       |                       |                       |                       |                       | 1.6119***<br>(0.1459) |                       |
| Low Emotional range (Sender) x<br>High Emotional range (Recipient)      |                       |                       |                       |                       | 1.0822<br>(0.1674)    |                       |
| High Emotional range (Sender) x<br>Low Emotional range (Recipient)      |                       |                       |                       |                       | 0.9103<br>(0.1049)    |                       |
| High Emotional range (Sender) x<br>High Emotional range (Recipient)     |                       |                       |                       |                       | 0.5369**<br>(0.1164)  |                       |
| Low Openness (Sender) x<br>Low Openness (Recipient)                     |                       |                       |                       |                       |                       | 0.9529<br>(0.3897)    |
| Low Openness (Sender) x<br>High Openness (Recipient)                    |                       |                       |                       |                       |                       | 0.7611<br>(0.1517)    |
|                                                                         |                       |                       |                       |                       |                       | 1.7139*               |

|                                                       |                    |          |          |          |          |                       |
|-------------------------------------------------------|--------------------|----------|----------|----------|----------|-----------------------|
| High Openness (Sender) x<br>Low Openness (Recipient)  |                    |          |          |          |          | (0.3806)              |
| High Openness (Sender) x<br>High Openness (Recipient) |                    |          |          |          |          | 1.3596***<br>(0.1218) |
| Visible message=1                                     | 1.1818<br>(0.1020) |          |          |          |          |                       |
| Sender\Recipient controls                             | Yes                | Yes      | Yes      | Yes      | Yes      | Yes                   |
| Message controls                                      | Yes                | Yes      | Yes      | Yes      | Yes      | Yes                   |
| Product controls                                      | Yes                | Yes      | Yes      | Yes      | Yes      | Yes                   |
| Log-likelihood                                        | -31785.2           | -31749.4 | -31731.7 | -31717   | -31647.6 | -31747.1              |
| BIC                                                   | 63887.75           | 63852.65 | 63817.28 | 63787.94 | 63649.13 | 63848.09              |
| AIC                                                   | 63622.45           | 63556.74 | 63521.37 | 63492.03 | 63353.21 | 63552.18              |
| chi2                                                  | 2807.676           | 3293.54  | 2924.079 | 3044.417 | 3126.634 | 2843.099              |
| p                                                     | 0.0000             | 0.0000   | 0.0000   | 0.0000   | 0.0000   | 0.0000                |
| N                                                     | 199563             | 199563   | 199563   | 199563   | 199563   | 199563                |

Note: Semiparametric survival analysis with Cox proportional hazards model adjusting for possibly correlated observations. The hazard ratios (HRs) represent the percent increase (HR > 1) or decrease (HR < 1) in post-purchase hazards associated with each attribute. The baseline case for Models (2)-(6) represents dyads in which the WOM message was not visible. Significance levels: \* p<0.05, \*\* p<0.01, \*\*\* p<0.001

**Table A5: Survival Analysis (Personality Similarity with Additional Message Controls)**

|                                                                   | Model 1               | Model 2               | Model 3               | Model 4               | Model 5               | Model 6               | Model 7               | Model 8               |
|-------------------------------------------------------------------|-----------------------|-----------------------|-----------------------|-----------------------|-----------------------|-----------------------|-----------------------|-----------------------|
| User similarity                                                   | 1.0995***<br>(0.0043) | 1.1003***<br>(0.0044) | 1.0975***<br>(0.0044) | 1.0954***<br>(0.0044) | 1.2947***<br>(0.0219) | 1.2930***<br>(0.0219) | 1.2959***<br>(0.0216) | 1.2789***<br>(0.0213) |
| Reciprocal relationship                                           | 7.3975***<br>(0.3484) | 7.4114***<br>(0.3493) | 6.7992***<br>(0.3224) | 6.8597***<br>(0.3252) | 6.9887***<br>(0.3105) | 6.9631***<br>(0.3096) | 6.9818***<br>(0.3110) | 6.3488***<br>(0.2911) |
| # Peer-to-Peer interactions                                       | 1.0008<br>(0.0008)    | 1.0009<br>(0.0008)    | 1.0006<br>(0.0009)    | 1.0006<br>(0.0009)    | 1.0006<br>(0.0008)    | 1.0006<br>(0.0008)    | 1.0008<br>(0.0008)    | 1.0005<br>(0.0009)    |
| Sentiment of message                                              | 1.6017***<br>(0.1073) | 1.6013***<br>(0.1074) | 1.5220***<br>(0.1008) | 1.5776***<br>(0.1055) | 1.6453***<br>(0.1040) | 1.6235***<br>(0.1029) | 1.5622***<br>(0.0991) | 1.4497***<br>(0.0952) |
| Personalized message                                              | 1.1076***<br>(0.0052) | 1.1079***<br>(0.0052) | 1.1072***<br>(0.0052) | 1.1048***<br>(0.0053) | 1.0552***<br>(0.0039) | 1.0534***<br>(0.0039) | 1.0487***<br>(0.0052) | 1.0388***<br>(0.0053) |
| User expertise (Sender)                                           | 1.2492***<br>(0.0290) | 1.2467***<br>(0.0290) | 1.2596***<br>(0.0294) | 1.2671***<br>(0.0296) | 1.1994***<br>(0.0256) | 1.1933***<br>(0.0254) | 1.2125***<br>(0.0260) | 1.1931***<br>(0.0265) |
| User leadership (Sender)                                          | 1.0136***<br>(0.0017) | 1.0136***<br>(0.0017) | 1.0109***<br>(0.0017) | 1.0106***<br>(0.0017) | 1.0096***<br>(0.0018) | 1.0097***<br>(0.0018) | 1.0099***<br>(0.0018) | 1.0047*<br>(0.0018)   |
| Personality similarity (Main personality type)                    |                       | 0.9545<br>(0.0454)    |                       |                       |                       |                       |                       |                       |
| Personality similarity                                            |                       |                       | 1.4765***<br>(0.0481) |                       |                       |                       |                       |                       |
| Personality similarity (Agreeableness)                            |                       |                       |                       | 1.1057*<br>(0.0494)   | 1.4597***<br>(0.1141) | 1.4581***<br>(0.1141) | 1.4436***<br>(0.1138) | 1.4379***<br>(0.1133) |
| Personality similarity (Conscientiousness)                        |                       |                       |                       | 1.0684<br>(0.0401)    | 0.9705<br>(0.0474)    | 0.9746<br>(0.0476)    | 0.9889<br>(0.0484)    | 1.0130<br>(0.0493)    |
| Personality similarity (Extraversion)                             |                       |                       |                       | 1.3163***<br>(0.0621) | 0.9713<br>(0.0656)    | 0.9614<br>(0.0651)    | 0.9261<br>(0.0634)    | 0.8999<br>(0.0620)    |
| Personality similarity (Emotional range)                          |                       |                       |                       | 1.0365<br>(0.0415)    | 1.0047<br>(0.0399)    | 1.0021<br>(0.0398)    | 1.0129<br>(0.0405)    | 1.0112<br>(0.0406)    |
| Personality similarity (Openness)                                 |                       |                       |                       | 1.0485<br>(0.0459)    | 0.9108<br>(0.0655)    | 0.9082<br>(0.0653)    | 0.9324<br>(0.0666)    | 0.9178<br>(0.0652)    |
| Visible message=1                                                 |                       |                       |                       |                       | 1.2801***<br>(0.0928) | 1.2139**<br>(0.0890)  | 1.1668*<br>(0.0858)   | 1.4180***<br>(0.1065) |
| Visible message=1 x<br>Personality similarity (Agreeableness)     |                       |                       |                       |                       | 0.7612**<br>(0.0682)  | 0.7713**<br>(0.0691)  | 0.7722**<br>(0.0695)  | 0.7627**<br>(0.0690)  |
| Visible message=1 x<br>Personality similarity (Conscientiousness) |                       |                       |                       |                       | 1.0856<br>(0.0666)    | 1.0839<br>(0.0664)    | 1.0670<br>(0.0658)    | 1.0152<br>(0.0626)    |
| Visible message=1 x<br>Personality similarity (Extraversion)      |                       |                       |                       |                       | 1.3646***<br>(0.1120) | 1.3640***<br>(0.1121) | 1.4061***<br>(0.1165) | 1.4567***<br>(0.1220) |
| Visible message=1 x<br>Personality similarity (Emotional range)   |                       |                       |                       |                       | 0.9977<br>(0.0558)    | 0.9983<br>(0.0559)    | 0.9907<br>(0.0557)    | 1.0260<br>(0.0579)    |
| Visible message=1 x<br>Personality similarity (Openness)          |                       |                       |                       |                       | 1.1875*<br>(0.0999)   | 1.1952*<br>(0.1005)   | 1.1551<br>(0.0968)    | 1.1677<br>(0.0976)    |
| Sender\Recipient popularity controls                              | Yes                   |
| Message controls                                                  | No                    | No                    | No                    | No                    | No                    | Yes                   | Yes                   | Yes                   |
| Product controls                                                  | No                    | No                    | No                    | No                    | No                    | No                    | Yes                   | Yes                   |
| Additional Sender\Recipient controls                              | No                    | Yes                   |
| Log-likelihood                                                    | -23722.4              | -23721.9              | -23642.1              | -23645.5              | -31815.8              | -31804.9              | -31779.8              | -31589.6              |
| BIC                                                               | 47576.01              | 47586.98              | 47427.46              | 47482.04              | 63912.19              | 63902.63              | 63889.08              | 63618.49              |
| AIC                                                               | 47466.71              | 47467.75              | 47308.22              | 47323.06              | 63677.51              | 63657.74              | 63613.57              | 63251.15              |
| chi2                                                              | 3589.740              | 3590.706              | 3750.229              | 3743.393              | 4135.005              | 4156.771              | 4206.937              | 4587.359              |
| p                                                                 | 0.0000                | 0.0000                | 0.0000                | 0.0000                | 0.0000                | 0.0000                | 0.0000                | 0.0000                |
| N                                                                 | 152730                | 152730                | 152730                | 152730                | 199563                | 199563                | 199563                | 199563                |

Note: Semiparametric survival analysis with Cox proportional hazards model. The presented econometric specifications control whether each message was explicitly made visible to all followers. The hazard ratios (HRs) represent the percent increase (HR > 1) or decrease (HR < 1) in post-purchase hazards associated with each attribute. Significance levels: \* p<0.05, \*\* p<0.01, \*\*\* p<0.001

**Table A6: Survival Analysis (Personality Characteristics with Additional Message Controls)**

|                                            | Model 1               | Model 2               | Model 3               | Model 4               | Model 5               | Model 6               |
|--------------------------------------------|-----------------------|-----------------------|-----------------------|-----------------------|-----------------------|-----------------------|
| Personality similarity (Agreeableness)     | 1.4436***<br>(0.1138) |                       | 1.3778***<br>(0.1066) | 1.3252***<br>(0.0937) | 1.4278***<br>(0.1121) | 1.5241***<br>(0.1119) |
| Personality similarity (Conscientiousness) | 0.9889<br>(0.0484)    | 1.1046*<br>(0.0526)   |                       | 1.0391<br>(0.0508)    | 1.1395**<br>(0.0526)  | 1.0354<br>(0.0478)    |
| Personality similarity (Extraversion)      | 0.9261<br>(0.0634)    | 1.0506<br>(0.0707)    | 0.9194<br>(0.0637)    |                       | 0.8023**<br>(0.0562)  | 0.9514<br>(0.0654)    |
| Personality similarity (Emotional range)   | 1.0129<br>(0.0405)    | 1.0695<br>(0.0454)    | 1.0870*<br>(0.0434)   | 0.9775<br>(0.0400)    |                       | 0.9552<br>(0.0379)    |
| Personality similarity (Openness)          | 0.9324<br>(0.0666)    | 1.0912<br>(0.0761)    | 1.0120<br>(0.0690)    | 0.8549*<br>(0.0592)   | 0.9691<br>(0.0634)    |                       |
| Visible message=1 x                        | 0.7722**<br>(0.0695)  |                       | 0.7661**<br>(0.0686)  | 0.8572<br>(0.0701)    | 0.7451**<br>(0.0676)  | 0.7304***<br>(0.0619) |
| Personality similarity (Agreeableness)     |                       |                       |                       |                       |                       |                       |
| Visible message=1 x                        | 1.0670<br>(0.0658)    | 0.9804<br>(0.0596)    |                       | 1.0202<br>(0.0630)    | 1.0061<br>(0.0552)    | 1.0249<br>(0.0611)    |
| Personality similarity (Conscientiousness) |                       |                       |                       |                       |                       |                       |
| Visible message=1 x                        | 1.4061***<br>(0.1165) | 1.1864*<br>(0.0953)   | 1.4375***<br>(0.1208) |                       | 1.5809***<br>(0.1340) | 1.3940***<br>(0.1148) |
| Personality similarity (Extraversion)      |                       |                       |                       |                       |                       |                       |
| Visible message=1 x                        | 0.9907<br>(0.0557)    | 0.9228<br>(0.0540)    | 0.9825<br>(0.0512)    | 1.0278<br>(0.0586)    |                       | 1.0322<br>(0.0570)    |
| Personality similarity (Emotional range)   |                       |                       |                       |                       |                       |                       |
| Visible message=1 x                        | 1.1551<br>(0.0968)    | 0.9608<br>(0.0805)    | 1.0873<br>(0.0889)    | 1.1898*<br>(0.0977)   | 1.1581<br>(0.0918)    |                       |
| Personality similarity (Openness)          |                       |                       |                       |                       |                       |                       |
| Low Agreeableness (Sender) x               |                       | 0.6072***<br>(0.0485) |                       |                       |                       |                       |
| Low Agreeableness (Recipient)              |                       |                       |                       |                       |                       |                       |
| Low Agreeableness (Sender) x               |                       | 0.5502***<br>(0.0546) |                       |                       |                       |                       |
| High Agreeableness (Recipient)             |                       |                       |                       |                       |                       |                       |
| High Agreeableness (Sender) x              |                       | 1.2860*<br>(0.1282)   |                       |                       |                       |                       |
| Low Agreeableness (Recipient)              |                       |                       |                       |                       |                       |                       |
| High Agreeableness (Sender) x              |                       | 1.0609<br>(0.1351)    |                       |                       |                       |                       |
| High Agreeableness (Recipient)             |                       |                       |                       |                       |                       |                       |
| Low Conscientiousness (Sender) x           |                       |                       | 0.6818*<br>(0.1138)   |                       |                       |                       |
| Low Conscientiousness (Recipient)          |                       |                       |                       |                       |                       |                       |
| Low Conscientiousness (Sender) x           |                       |                       | 0.9871<br>(0.1018)    |                       |                       |                       |
| High Conscientiousness (Recipient)         |                       |                       |                       |                       |                       |                       |
| High Conscientiousness (Sender) x          |                       |                       | 1.6188***<br>(0.1980) |                       |                       |                       |
| Low Conscientiousness (Recipient)          |                       |                       |                       |                       |                       |                       |
| High Conscientiousness (Sender) x          |                       |                       | 1.7201***<br>(0.1482) |                       |                       |                       |
| High Conscientiousness (Recipient)         |                       |                       |                       |                       |                       |                       |
| Low Extraversion (Sender) x                |                       |                       |                       | 1.1875*<br>(0.0912)   |                       |                       |
| Low Extraversion (Recipient)               |                       |                       |                       |                       |                       |                       |
| Low Extraversion (Sender) x                |                       |                       |                       | 0.5787***<br>(0.0771) |                       |                       |
| High Extraversion (Recipient)              |                       |                       |                       |                       |                       |                       |
| High Extraversion (Sender) x               |                       |                       |                       | 1.6269***<br>(0.1937) |                       |                       |
| Low Extraversion (Recipient)               |                       |                       |                       |                       |                       |                       |
| High Extraversion (Sender) x               |                       |                       |                       | 0.8926<br>(0.1821)    |                       |                       |
| High Extraversion (Recipient)              |                       |                       |                       |                       |                       |                       |
| Low Emotional range (Sender) x             |                       |                       |                       |                       | 1.5924***<br>(0.1231) |                       |
| Low Emotional range (Recipient)            |                       |                       |                       |                       |                       |                       |
| Low Emotional range (Sender) x             |                       |                       |                       |                       | 1.0749<br>(0.1383)    |                       |
| High Emotional range (Recipient)           |                       |                       |                       |                       |                       |                       |
| High Emotional range (Sender) x            |                       |                       |                       |                       | 0.9014<br>(0.0949)    |                       |
| Low Emotional range (Recipient)            |                       |                       |                       |                       |                       |                       |
| High Emotional range (Sender) x            |                       |                       |                       |                       | 0.5232***<br>(0.1009) |                       |
| High Emotional range (Recipient)           |                       |                       |                       |                       |                       |                       |
| Low Openness (Sender) x                    |                       |                       |                       |                       |                       | 0.9342<br>(0.3395)    |
| Low Openness (Recipient)                   |                       |                       |                       |                       |                       |                       |
| Low Openness (Sender) x                    |                       |                       |                       |                       |                       | 0.7446<br>(0.1363)    |
| High Openness (Recipient)                  |                       |                       |                       |                       |                       |                       |
| High Openness (Sender) x                   |                       |                       |                       |                       |                       | 1.7043***             |

|                           |          |           |
|---------------------------|----------|-----------|
| Low Openness (Recipient)  |          | (0.2682)  |
| High Openness (Sender) x  |          | 1.3489*** |
| High Openness (Recipient) |          | (0.1055)  |
| Visible message=1         | 1.1668*  |           |
|                           | (0.0858) |           |

|                |          |          |          |          |          |          |
|----------------|----------|----------|----------|----------|----------|----------|
| Log-likelihood | -31779.8 | -31742.9 | -31722.4 | -31711.5 | -31635.8 | -31740.2 |
| BIC            | 63889.08 | 63851.88 | 63810.97 | 63789.11 | 63637.77 | 63846.45 |
| AIC            | 63613.57 | 63545.77 | 63504.85 | 63483.00 | 63331.66 | 63540.34 |
| chi2           | 4206.937 | 4280.745 | 4321.657 | 4343.512 | 4494.854 | 4286.173 |
| P              | 0.0000   | 0.0000   | 0.0000   | 0.0000   | 0.0000   | 0.0000   |
| N              | 199563   | 199563   | 199563   | 199563   | 199563   | 199563   |

Note: Semiparametric survival analysis with Cox proportional hazards model. The presented econometric specifications control whether each message was explicitly made visible to all followers. The hazard ratios (HRs) represent the percent increase (HR > 1) or decrease (HR < 1) in post-purchase hazards associated with each attribute. The baseline case for Models (2)-(6) represents dyads in which the WOM message was not visible. Significance levels: \* p<0.05, \*\* p<0.01, \*\*\* p<0.001

**Table A7: Survival Analysis (Personality Similarity with Additional User Similarity Controls)**

|                                                                   | Model 1               | Model 2               | Model 3               | Model 4               | Model 5               | Model 6               | Model 7               | Model 8               |
|-------------------------------------------------------------------|-----------------------|-----------------------|-----------------------|-----------------------|-----------------------|-----------------------|-----------------------|-----------------------|
| User similarity                                                   | 1.1720***<br>(0.0093) | 1.1749***<br>(0.0095) | 1.1613***<br>(0.0094) | 1.1599***<br>(0.0093) | 1.2833***<br>(0.0251) | 1.2811***<br>(0.0250) | 1.2946***<br>(0.0253) | 1.2722***<br>(0.0250) |
| User similarity (Intrinsic preferences)                           | 2.2117***<br>(0.0615) | 2.2129***<br>(0.0616) | 2.1888***<br>(0.0609) | 2.1927***<br>(0.0610) | 2.0632***<br>(0.0508) | 2.0622***<br>(0.0508) | 2.1277***<br>(0.0529) | 2.2514***<br>(0.0570) |
| Reciprocal relationship                                           | 5.3049***<br>(0.2725) | 5.3115***<br>(0.2730) | 5.0340***<br>(0.2587) | 5.0759***<br>(0.2605) | 5.2861***<br>(0.2524) | 5.2618***<br>(0.2513) | 5.1572***<br>(0.2466) | 4.7278***<br>(0.2315) |
| # Peer-to-Peer interactions                                       | 1.0003<br>(0.0007)    | 1.0003<br>(0.0007)    | 1.0003<br>(0.0007)    | 1.0003<br>(0.0007)    | 1.0002<br>(0.0007)    | 1.0003<br>(0.0007)    | 1.0003<br>(0.0007)    | 1.0001<br>(0.0007)    |
| Sentiment of message                                              | 1.5219***<br>(0.1026) | 1.5255***<br>(0.1030) | 1.4676***<br>(0.0979) | 1.5201***<br>(0.1023) | 1.5804***<br>(0.1006) | 1.5685***<br>(0.1001) | 1.4888***<br>(0.0953) | 1.3986***<br>(0.0923) |
| Personalized message                                              | 1.0874***<br>(0.0053) | 1.0878***<br>(0.0053) | 1.0870***<br>(0.0053) | 1.0846***<br>(0.0053) | 1.0330***<br>(0.0039) | 1.0311***<br>(0.0040) | 1.0240***<br>(0.0051) | 1.0101<br>(0.0052)    |
| User expertise (Sender)                                           | 1.2052***<br>(0.0283) | 1.1986***<br>(0.0283) | 1.2142***<br>(0.0286) | 1.2242***<br>(0.0289) | 1.1672***<br>(0.0252) | 1.1627***<br>(0.0250) | 1.1821***<br>(0.0255) | 1.1479***<br>(0.0255) |
| User leadership (Sender)                                          | 1.0165***<br>(0.0017) | 1.0164***<br>(0.0017) | 1.0143***<br>(0.0017) | 1.0138***<br>(0.0017) | 1.0128***<br>(0.0017) | 1.0130***<br>(0.0017) | 1.0133***<br>(0.0018) | 1.0084***<br>(0.0019) |
| Personality similarity (Main personality type)                    |                       | 0.9115*<br>(0.0431)   |                       |                       |                       |                       |                       |                       |
| Personality similarity                                            |                       |                       | 1.3931***<br>(0.0461) |                       |                       |                       |                       |                       |
| Personality similarity (Agreeableness)                            |                       |                       |                       | 1.1195*<br>(0.0494)   | 1.4511***<br>(0.1128) | 1.4497***<br>(0.1128) | 1.4084***<br>(0.1109) | 1.4035***<br>(0.1102) |
| Personality similarity (Conscientiousness)                        |                       |                       |                       | 1.0214<br>(0.0387)    | 0.9495<br>(0.0467)    | 0.9534<br>(0.0468)    | 0.9654<br>(0.0476)    | 0.9955<br>(0.0488)    |
| Personality similarity (Extraversion)                             |                       |                       |                       | 1.2670***<br>(0.0592) | 0.9903<br>(0.0668)    | 0.9792<br>(0.0663)    | 0.9226<br>(0.0634)    | 0.8949<br>(0.0618)    |
| Personality similarity (Emotional range)                          |                       |                       |                       | 1.0363<br>(0.0424)    | 0.9993<br>(0.0396)    | 0.9966<br>(0.0396)    | 1.0186<br>(0.0407)    | 1.0160<br>(0.0408)    |
| Personality similarity (Openness)                                 |                       |                       |                       | 1.0291<br>(0.0457)    | 0.8984<br>(0.0649)    | 0.8957<br>(0.0647)    | 0.9531<br>(0.0676)    | 0.9313<br>(0.0656)    |
| Visible message=1                                                 |                       |                       |                       |                       | 1.2972***<br>(0.0971) | 1.2214**<br>(0.0926)  | 1.1317<br>(0.0853)    | 1.3913***<br>(0.1067) |
| Visible message=1 x<br>Personality similarity (Agreeableness)     |                       |                       |                       |                       | 0.7779**<br>(0.0692)  | 0.7887**<br>(0.0702)  | 0.7946*<br>(0.0714)   | 0.7609**<br>(0.0688)  |
| Visible message=1 x<br>Personality similarity (Conscientiousness) |                       |                       |                       |                       | 1.0691<br>(0.0660)    | 1.0697<br>(0.0660)    | 1.0672<br>(0.0664)    | 0.9972<br>(0.0621)    |
| Visible message=1 x<br>Personality similarity (Extraversion)      |                       |                       |                       |                       | 1.2875**<br>(0.1054)  | 1.2853**<br>(0.1054)  | 1.3561***<br>(0.1127) | 1.4037***<br>(0.1181) |
| Visible message=1 x<br>Personality similarity (Emotional range)   |                       |                       |                       |                       | 1.0006<br>(0.0565)    | 1.0016<br>(0.0567)    | 0.9834<br>(0.0560)    | 1.0218<br>(0.0583)    |
| Visible message=1 x<br>Personality similarity (Openness)          |                       |                       |                       |                       | 1.1759<br>(0.0997)    | 1.1815*<br>(0.1001)   | 1.0994<br>(0.0922)    | 1.1297<br>(0.0944)    |
| Sender\Recipient popularity controls                              | Yes                   |
| Message controls                                                  | No                    | No                    | No                    | No                    | No                    | Yes                   | Yes                   | Yes                   |
| Product controls                                                  | No                    | No                    | No                    | No                    | No                    | No                    | Yes                   | Yes                   |
| Additional Sender\Recipient controls                              | No                    | Yes                   |
| Log-likelihood                                                    | -23070.0              | -23068.0              | -23015.0              | -23015.1              | -31144.4              | -31132.6              | -31068.5              | -30813.0              |
| BIC                                                               | 46271.26              | 46279.32              | 46173.21              | 46221.17              | 62569.40              | 62557.99              | 62466.46              | 62065.36              |
| AIC                                                               | 46161.97              | 46160.09              | 46053.98              | 46062.20              | 62334.72              | 62313.12              | 62190.97              | 61698.04              |
| chi2                                                              | 4795.723              | 4799.604              | 4905.714              | 4905.495              | 5376.738              | 5400.345              | 5528.487              | 6039.417              |
| P                                                                 | 0.0000                | 0.0000                | 0.0000                | 0.0000                | 0.0000                | 0.0000                | 0.0000                | 0.0000                |
| N                                                                 | 152610                | 152610                | 152610                | 152610                | 199437                | 199437                | 199437                | 199437                |

Note: Semiparametric survival analysis with Cox proportional hazards model. The presented econometric specifications include additional controls for similarity in intrinsic taste and preferences. The hazard ratios (HRs) represent the percent increase (HR > 1) or decrease (HR < 1) in post-purchase hazards associated with each attribute. Significance levels: \* p<0.05, \*\* p<0.01, \*\*\* p<0.001

**Table A8: Survival Analysis (Personality Characteristics with Additional User Similarity Controls)**

|                                            | Model 1               | Model 2               | Model 3               | Model 4               | Model 5               | Model 6               |
|--------------------------------------------|-----------------------|-----------------------|-----------------------|-----------------------|-----------------------|-----------------------|
| Personality similarity (Agreeableness)     | 1.4084***<br>(0.1109) |                       | 1.3772***<br>(0.1072) | 1.3073***<br>(0.0926) | 1.4085***<br>(0.1109) | 1.5133***<br>(0.1119) |
| Personality similarity (Conscientiousness) | 0.9654<br>(0.0476)    | 1.0598<br>(0.0511)    |                       | 1.0208<br>(0.0504)    | 1.1164*<br>(0.0519)   | 1.0233<br>(0.0477)    |
| Personality similarity (Extraversion)      | 0.9226<br>(0.0634)    | 0.9965<br>(0.0675)    | 0.9055<br>(0.0630)    |                       | 0.8018**<br>(0.0563)  | 0.9552<br>(0.0660)    |
| Personality similarity (Emotional range)   | 1.0186<br>(0.0407)    | 1.0671<br>(0.0452)    | 1.1012*<br>(0.0441)   | 0.9842<br>(0.0402)    |                       | 0.9522<br>(0.0380)    |
| Personality similarity (Openness)          | 0.9531<br>(0.0676)    | 1.1161<br>(0.0775)    | 1.0188<br>(0.0690)    | 0.8766<br>(0.0605)    | 0.9833<br>(0.0637)    |                       |
| Visible message=1 x                        | 0.7946*<br>(0.0714)   |                       | 0.7503**<br>(0.0675)  | 0.8567<br>(0.0702)    | 0.7481**<br>(0.0680)  | 0.7277***<br>(0.0621) |
| Personality similarity (Agreeableness)     |                       |                       |                       |                       |                       |                       |
| Visible message=1 x                        | 1.0672<br>(0.0664)    | 1.0038<br>(0.0618)    |                       | 1.0151<br>(0.0633)    | 1.0139<br>(0.0560)    | 1.0134<br>(0.0611)    |
| Personality similarity (Conscientiousness) |                       |                       |                       |                       |                       |                       |
| Visible message=1 x                        | 1.3561***<br>(0.1127) | 1.1960*<br>(0.0969)   | 1.4143***<br>(0.1192) |                       | 1.5199***<br>(0.1291) | 1.3214***<br>(0.1089) |
| Personality similarity (Extraversion)      |                       |                       |                       |                       |                       |                       |
| Visible message=1 x                        | 0.9834<br>(0.0560)    | 0.9266<br>(0.0549)    | 0.9729<br>(0.0510)    | 1.0265<br>(0.0593)    |                       | 1.0374<br>(0.0582)    |
| Personality similarity (Emotional range)   |                       |                       |                       |                       |                       |                       |
| Visible message=1 x                        | 1.0994<br>(0.0922)    | 0.9194<br>(0.0777)    | 1.0696<br>(0.0875)    | 1.1190<br>(0.0921)    | 1.1228<br>(0.0889)    |                       |
| Personality similarity (Openness)          |                       |                       |                       |                       |                       |                       |
| Low Agreeableness (Sender) x               |                       | 0.6681***<br>(0.0535) |                       |                       |                       |                       |
| Low Agreeableness (Recipient)              |                       |                       |                       |                       |                       |                       |
| Low Agreeableness (Sender) x               |                       | 0.5806***<br>(0.0580) |                       |                       |                       |                       |
| High Agreeableness (Recipient)             |                       |                       |                       |                       |                       |                       |
| High Agreeableness (Sender) x              |                       | 1.4921***<br>(0.1498) |                       |                       |                       |                       |
| Low Agreeableness (Recipient)              |                       |                       |                       |                       |                       |                       |
| High Agreeableness (Sender) x              |                       | 1.2083<br>(0.1538)    |                       |                       |                       |                       |
| High Agreeableness (Recipient)             |                       |                       |                       |                       |                       |                       |
| Low Conscientiousness (Sender) x           |                       |                       | 0.8013<br>(0.1338)    |                       |                       |                       |
| Low Conscientiousness (Recipient)          |                       |                       |                       |                       |                       |                       |
| Low Conscientiousness (Sender) x           |                       |                       | 1.0027<br>(0.1042)    |                       |                       |                       |
| High Conscientiousness (Recipient)         |                       |                       |                       |                       |                       |                       |
| High Conscientiousness (Sender) x          |                       |                       | 1.6857***<br>(0.2105) |                       |                       |                       |
| Low Conscientiousness (Recipient)          |                       |                       |                       |                       |                       |                       |
| High Conscientiousness (Sender) x          |                       |                       | 1.6614***<br>(0.1463) |                       |                       |                       |
| High Conscientiousness (Recipient)         |                       |                       |                       |                       |                       |                       |
| Low Extraversion (Sender) x                |                       |                       |                       | 1.1327<br>(0.0892)    |                       |                       |
| Low Extraversion (Recipient)               |                       |                       |                       |                       |                       |                       |
| Low Extraversion (Sender) x                |                       |                       |                       | 0.5712***<br>(0.0772) |                       |                       |
| High Extraversion (Recipient)              |                       |                       |                       |                       |                       |                       |
| High Extraversion (Sender) x               |                       |                       |                       | 1.5605***<br>(0.1859) |                       |                       |
| Low Extraversion (Recipient)               |                       |                       |                       |                       |                       |                       |
| High Extraversion (Sender) x               |                       |                       |                       | 0.9917<br>(0.2028)    |                       |                       |
| High Extraversion (Recipient)              |                       |                       |                       |                       |                       |                       |
| Low Emotional range (Sender) x             |                       |                       |                       |                       | 1.5460***<br>(0.1218) |                       |
| Low Emotional range (Recipient)            |                       |                       |                       |                       |                       |                       |
| Low Emotional range (Sender) x             |                       |                       |                       |                       | 1.0518<br>(0.1379)    |                       |
| High Emotional range (Recipient)           |                       |                       |                       |                       |                       |                       |
| High Emotional range (Sender) x            |                       |                       |                       |                       | 0.9106<br>(0.0969)    |                       |
| Low Emotional range (Recipient)            |                       |                       |                       |                       |                       |                       |
| High Emotional range (Sender) x            |                       |                       |                       |                       | 0.6201*<br>(0.1195)   |                       |
| High Emotional range (Recipient)           |                       |                       |                       |                       |                       |                       |
| Low Openness (Sender) x                    |                       |                       |                       |                       |                       | 1.1518<br>(0.4217)    |
| Low Openness (Recipient)                   |                       |                       |                       |                       |                       |                       |
| Low Openness (Sender) x                    |                       |                       |                       |                       |                       | 0.7490<br>(0.1372)    |
| High Openness (Recipient)                  |                       |                       |                       |                       |                       |                       |
| High Openness (Sender) x                   |                       |                       |                       |                       |                       | 1.9003***             |

|                           |          |          |          |          |          |          |
|---------------------------|----------|----------|----------|----------|----------|----------|
| Low Openness (Recipient)  |          |          |          |          |          | (0.3051) |
| High Openness (Sender) x  |          |          |          |          |          | 1.2995** |
| High Openness (Recipient) |          |          |          |          |          | (0.1043) |
| Visible message=1         | 1.1317   |          |          |          |          |          |
|                           | (0.0853) |          |          |          |          |          |
| Sender\Recipient controls | Yes      | Yes      | Yes      | Yes      | Yes      | Yes      |
| Message controls          | Yes      | Yes      | Yes      | Yes      | Yes      | Yes      |
| Product controls          | Yes      | Yes      | Yes      | Yes      | Yes      | Yes      |
| Log-likelihood            | -31068.5 | -30997.0 | -31007.5 | -30999.6 | -30928.3 | -31028.4 |
| BIC                       | 62466.46 | 62360.19 | 62381.17 | 62365.36 | 62222.60 | 62422.89 |
| AIC                       | 62190.97 | 62054.09 | 62075.07 | 62059.26 | 61916.50 | 62116.80 |
| chi2                      | 5528.487 | 5671.37  | 5650.389 | 5666.200 | 5808.959 | 5608.665 |
| P                         | 0.0000   | 0.0000   | 0.0000   | 0.0000   | 0.0000   | 0.0000   |
| N                         | 199437   | 199437   | 199437   | 199437   | 199437   | 199437   |

Note: Semiparametric survival analysis with Cox proportional hazards model. The presented econometric specifications include additional controls for similarity in intrinsic taste and preferences. The hazard ratios (HRs) represent the percent increase (HR > 1) or decrease (HR < 1) in post-purchase hazards associated with each attribute. The baseline case for Models (2)-(6) represents dyads in which the WOM message was not visible. Significance levels: \* p<0.05, \*\* p<0.01, \*\*\* p<0.001

**Table A9: Latent Variable Model (Personality Characteristics)**

|                                                                  | Coef.                 | Std. Err. | z      | P>z         | [95% Conf. Interval] |          |
|------------------------------------------------------------------|-----------------------|-----------|--------|-------------|----------------------|----------|
| User similarity (Latent variable)                                | 2.11457               | 0.41895   | 5.05   | 0.000       | 1.29344              | 2.93570  |
| Reciprocal relationship                                          | 0.05895               | 0.00107   | 55.29  | 0.000       | 0.05686              | 0.06104  |
| # Peer-to-peer interactions                                      | 0.00024               | 0.00004   | 5.50   | 0.000       | 0.00015              | 0.00032  |
| Sentiment of message                                             | 0.00632               | 0.00084   | 7.55   | 0.000       | 0.00468              | 0.00796  |
| Personalized message                                             | -0.00060              | 0.00011   | -5.29  | 0.000       | -0.00082             | -0.00038 |
| User expertise (Sender)                                          | -0.01432              | 0.00140   | -10.22 | 0.000       | -0.01707             | -0.01158 |
| User leadership (Sender)                                         | 0.00017               | 0.00002   | 8.27   | 0.000       | 0.00013              | 0.00021  |
| Personality similarity (Agreeableness)                           | 0.00409               | 0.00097   | 4.23   | 0.000       | 0.00219              | 0.00598  |
| Personality similarity (Conscientiousness)                       | -0.00063              | 0.00060   | -1.04  | 0.297       | -0.00180             | 0.00055  |
| Personality similarity (Extraversion)                            | 0.00069               | 0.00097   | 0.71   | 0.477       | -0.00121             | 0.00258  |
| Personality similarity (Emotional range)                         | 0.00014               | 0.00057   | 0.24   | 0.808       | -0.00098             | 0.00126  |
| Personality similarity (Openness)                                | 0.00001               | 0.00085   | 0.01   | 0.993       | -0.00167             | 0.00168  |
| Visible message = 1                                              | 0.00198               | 0.00088   | 2.25   | 0.024       | 0.00371              | 0.00026  |
| Visible message = 1 x Personality similarity (Agreeableness)     | -0.00271              | 0.00108   | -2.51  | 0.012       | -0.00483             | -0.00059 |
| Visible message = 1 x Personality similarity (Conscientiousness) | 0.00058               | 0.00075   | 0.78   | 0.435       | -0.00088             | 0.00205  |
| Visible message = 1 x Personality similarity (Extraversion)      | 0.00295               | 0.00110   | 2.69   | 0.007       | 0.00080              | 0.00510  |
| Visible message = 1 x Personality similarity (Emotional range)   | 0.00091               | 0.00073   | 1.24   | 0.215       | -0.00053             | 0.00235  |
| Visible message = 1 x Personality similarity (Openness)          | 0.00022               | 0.00097   | 0.23   | 0.819       | -0.00168             | 0.00212  |
| Variance (User similarity (Followees))                           | 0.89854               | 0.00284   |        |             | 0.89298              | 0.90413  |
| Variance (User similarity (Interests))                           | 0.90847               | 0.00286   |        |             | 0.90288              | 0.91409  |
| Variance (User similarity (Followers))                           | 0.83270               | 0.00264   |        |             | 0.82755              | 0.83789  |
| Variance (User similarity (Latent factor))                       | 0.00011               | 0.00004   |        |             | 0.00006              | 0.00023  |
| Sender\Recipient popularity controls                             |                       |           |        | Yes         |                      |          |
| Message controls                                                 |                       |           |        | Yes         |                      |          |
| Product controls                                                 |                       |           |        | Yes         |                      |          |
| User similarity (Latent variable)                                |                       |           |        |             |                      |          |
| User similarity (Followees)                                      | 1.00000 (constrained) |           |        |             |                      |          |
| User similarity (Interests)                                      | 33.28231              | 5.96033   | 5.58   | 0.000       | 21.60027             | 44.96434 |
| User similarity (Followers)                                      | 2.41744               | 0.47037   | 5.14   | 0.000       | 1.49554              | 3.33935  |
| Log-likelihood                                                   | -5282604.50           |           | N      | 199563      |                      |          |
| BIC                                                              | 10566429.00           |           | AIC    | 10565409.00 |                      |          |
| chi2                                                             | 1943505.60            |           | p      | 0.0000      |                      |          |

Note: Latent variable model. The similarity between the sender and the recipient of a WOM message is latent and measured based on the features described in section 4.2.3 of the manuscript, including information at the LDA topic level. The coefficients are reported in untransformed form (i.e., not exponentiated such as log odds). The coefficients related to the LDA topics are omitted because of space limitations.

**Table A10: Latent Variable Model (Personality Characteristics)**

|                                                                         | Model 1               | Model 2               | Model 3               | Model 4                | Model 5                | Model 6               |
|-------------------------------------------------------------------------|-----------------------|-----------------------|-----------------------|------------------------|------------------------|-----------------------|
| Personality similarity (Agreeableness)                                  | 0.0041***<br>(0.0010) |                       | 0.0034***<br>(0.0010) | 0.0039***<br>(0.0008)  | 0.0038***<br>(0.0010)  | 0.0037***<br>(0.0009) |
| Personality similarity (Conscientiousness)                              | -0.0006<br>(0.0006)   | 0.0002<br>(0.0006)    |                       | 0.0002<br>(0.0006)     | 0.0023***<br>(0.0006)  | 0.0000<br>(0.0006)    |
| Personality similarity (Extraversion)                                   | 0.0007<br>(0.0010)    | 0.0013<br>(0.0008)    | 0.0004<br>(0.0010)    |                        | -0.0009<br>(0.0010)    | 0.0009<br>(0.0009)    |
| Personality similarity (Emotional range)                                | 0.0001<br>(0.0006)    | 0.0002<br>(0.0006)    | 0.0018***<br>(0.0005) | -0.0002<br>(0.0006)    |                        | -0.0004<br>(0.0006)   |
| Personality similarity (Openness)                                       | 0.0000<br>(0.0009)    | 0.0010<br>(0.0008)    | 0.0011<br>(0.0008)    | -0.0008<br>(0.0008)    | 0.0005<br>(0.0008)     |                       |
| Visible message=1 x<br>Personality similarity (Agreeableness)           | -0.0027*<br>(0.0011)  |                       | -0.0027*<br>(0.0011)  | -0.0022*<br>(0.0009)   | -0.0033**<br>(0.0011)  | -0.0025*<br>(0.0010)  |
| Visible message=1 x<br>Personality similarity (Conscientiousness)       | 0.0006<br>(0.0007)    | 0.0003<br>(0.0007)    |                       | -0.0003<br>(0.0008)    | -0.0006<br>(0.0007)    | -0.0001<br>(0.0007)   |
| Visible message=1 x<br>Personality similarity (Extraversion)            | 0.0029**<br>(0.0011)  | 0.0016<br>(0.0009)    | 0.0032**<br>(0.0011)  |                        | 0.0037***<br>(0.0011)  | 0.0027**<br>(0.0010)  |
| Visible message=1 x<br>Personality similarity (Emotional range)         | 0.0009<br>(0.0007)    | 0.0002<br>(0.0007)    | -0.0001<br>(0.0007)   | 0.0008<br>(0.0007)     |                        | 0.0012<br>(0.0007)    |
| Visible message=1 x<br>Personality similarity (Openness)                | 0.0002<br>(0.0010)    | 0.9985<br>(0.0009)    | 0.9994<br>(0.0009)    | 1.0009<br>(0.0009)     | 1.0004<br>(0.0009)     |                       |
| Low Agreeableness (Sender) x<br>Low Agreeableness (Recipient)           |                       | -0.0025**<br>(0.0009) |                       |                        |                        |                       |
| Low Agreeableness (Sender) x<br>High Agreeableness (Recipient)          |                       | -0.0031*<br>(0.0013)  |                       |                        |                        |                       |
| High Agreeableness (Sender) x<br>Low Agreeableness (Recipient)          |                       | 0.0026<br>(0.0017)    |                       |                        |                        |                       |
| High Agreeableness (Sender) x<br>High Agreeableness (Recipient)         |                       | 0.0043*<br>(0.0020)   |                       |                        |                        |                       |
| Low Conscientiousness (Sender) x<br>Low Conscientiousness (Recipient)   |                       |                       | -0.0062**<br>(0.0022) |                        |                        |                       |
| Low Conscientiousness (Sender) x<br>High Conscientiousness (Recipient)  |                       |                       | -0.0026<br>(0.0013)   |                        |                        |                       |
| High Conscientiousness (Sender) x<br>Low Conscientiousness (Recipient)  |                       |                       | 0.0044**<br>(0.0015)  |                        |                        |                       |
| High Conscientiousness (Sender) x<br>High Conscientiousness (Recipient) |                       |                       | 0.0044***<br>(0.0010) |                        |                        |                       |
| Low Extraversion (Sender) x<br>Low Extraversion (Recipient)             |                       |                       |                       | -0.0013<br>(0.0010)    |                        |                       |
| Low Extraversion (Sender) x<br>High Extraversion (Recipient)            |                       |                       |                       | -0.0079***<br>(0.0013) |                        |                       |
| High Extraversion (Sender) x<br>Low Extraversion (Recipient)            |                       |                       |                       | 0.0037*<br>(0.0016)    |                        |                       |
| High Extraversion (Sender) x<br>High Extraversion (Recipient)           |                       |                       |                       | 0.0017<br>(0.0019)     |                        |                       |
| Low Emotional range (Sender) x<br>Low Emotional range (Recipient)       |                       |                       |                       |                        | 0.0054***<br>(0.0009)  |                       |
| Low Emotional range (Sender) x<br>High Emotional range (Recipient)      |                       |                       |                       |                        | 0.0012<br>(0.0016)     |                       |
| High Emotional range (Sender) x<br>Low Emotional range (Recipient)      |                       |                       |                       |                        | -0.0055***<br>(0.0016) |                       |
| High Emotional range (Sender) x<br>High Emotional range (Recipient)     |                       |                       |                       |                        | -0.0127***<br>(0.0030) |                       |
| Low Openness (Sender) x<br>Low Openness (Recipient)                     |                       |                       |                       |                        |                        | 0.0000<br>(0.0033)    |
| Low Openness (Sender) x<br>High Openness (Recipient)                    |                       |                       |                       |                        |                        | -0.0050*<br>(0.0020)  |
| High Openness (Sender) x                                                |                       |                       |                       |                        |                        | 0.0007                |

|                                            |               |               |               |               |               |               |
|--------------------------------------------|---------------|---------------|---------------|---------------|---------------|---------------|
| Low Openness (Recipient)                   |               |               |               |               |               | (0.0015)      |
| High Openness (Sender) x                   |               |               |               |               |               | -0.0019*      |
| High Openness (Recipient)                  |               |               |               |               |               | (0.0009)      |
| Visible message=1                          | 0.0020*       |               |               |               |               | (0.0009)      |
| Variance (User similarity (Followees))     | 0.8985***     | 0.8986***     | 0.8985***     | 0.8985***     | 0.8986***     | 0.8985***     |
|                                            | (0.0028)      | (0.0028)      | (0.0028)      | (0.0028)      | (0.0028)      | (0.0028)      |
| Variance (User similarity (Interests))     | 0.9085***     | 0.9099***     | 0.9079***     | 0.9080***     | 0.9098***     | 0.9083***     |
|                                            | (0.0029)      | (0.0029)      | (0.0029)      | (0.0029)      | (0.0029)      | (0.0029)      |
| Variance (User similarity (Followers))     | 0.8327***     | 0.8328***     | 0.8327***     | 0.8327***     | 0.8328***     | 0.8327***     |
|                                            | (0.0026)      | (0.0026)      | (0.0026)      | (0.0026)      | (0.0026)      | (0.0026)      |
| Variance (User similarity (Latent factor)) | 0.0001**      | 0.0000        | 0.0001*       | 0.0001*       | 0.0000        | 0.0001**      |
|                                            | (0.0000)      | (0.0000)      | (0.0000)      | (0.0001)      | (0.0000)      | (0.0000)      |
| Sender\Recipient popularity controls       |               |               |               | Yes           |               |               |
| Message controls                           |               |               |               | Yes           |               |               |
| Product controls                           |               |               |               | Yes           |               |               |
| <hr/>                                      |               |               |               |               |               |               |
| User similarity (Latent variable)          |               |               |               |               |               |               |
| User similarity (Followees)                | 1.0000        | 1.0000        | 1.0000        | 1.0000        | 1.0000        | 1.0000        |
|                                            | (constrained) | (constrained) | (constrained) | (constrained) | (constrained) | (constrained) |
| User similarity (Interests)                | 33.2823***    | 50.7491***    | 33.8780***    | 30.8236***    | 74.5505*      | 31.8114***    |
|                                            | (5.9603)      | (15.2877)     | (7.2450)      | (6.2264)      | (33.7011)     | (5.7196)      |
| User similarity (Followers)                | 2.4174***     | 0.0113***     | 0.0113***     | 0.0113***     | 0.0113***     | 0.0113***     |
|                                            | (0.4704)      | (0.0021)      | (0.0021)      | (0.0021)      | (0.0021)      | (0.0021)      |
| <hr/>                                      |               |               |               |               |               |               |
| Log-Likelihood                             | -5282604.5    | -6703764.2    | -6460247.2    | -6733768.2    | -6284303.8    | -6342833.0    |
| BIC                                        | 10566429.0    | 13408761.0    | 12921739.0    | 13468757.0    | 12569816.0    | 12686886.0    |
| AIC                                        | 10565409.0    | 13407730.0    | 12920698.0    | 13467736.0    | 12568806.0    | 12685866.0    |
| chi2                                       | 1943505.6     | 2005265.3     | 2000773.2     | 2002197.1     | 2006217.9     | 1983154.9     |
| p                                          | 0.0000        | 0.0000        | 0.0000        | 0.0000        | 0.0000        | 0.0000        |
| N                                          | 199,563       | 199,563       | 199,563       | 199,563       | 199,563       | 199,563       |

Note: Latent variable model. The similarity between the sender and the recipient of a WOM message is latent and measured based on the features described in section 4.2.3 of the manuscript, including information at the LDA topic level. The coefficients are reported in untransformed form (i.e., not exponentiated such as log odds). The baseline case for Models (2)-(6) represents dyads in which the WOM message was not visible. The coefficients related to the LDA topics are omitted because of space limitations. Significance levels: \* p<0.05, \*\* p<0.01, \*\*\* p<0.001

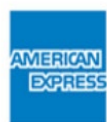

American Express @AmericanExpress · 13 Feb 2013

Get Sony Action Cam for \$179.99+tax w/synced Amex Card. Tweet

#BuyActionCamPack to start purch! QtyLtd Exp 3/3 Terms [amex.co/W4XhEH](http://amex.co/W4XhEH)

Figure A1: American Express announcing the sale of a product on the microblogging platform of Twitter.

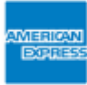

**American Express** ✓

@AmericanExpress

Get Sony Action Cam for \$179.99+tax  
w/synced Amex Card. Tweet  
[#BuyActionCamPack](#) to start purch! QtyLtd Exp  
3/3 Terms [amex.co/W4XhEH](https://amex.co/W4XhEH)

[#BuyActionCamPack @AmericanExpress](#)

Figure A2(a): Response message visible to all followers of the sender.

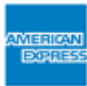

**American Express** ✓

@AmericanExpress

Get Sony Action Cam for \$179.99+tax  
w/synced Amex Card. Tweet  
[#BuyActionCamPack](#) to start purch! QtyLtd Exp  
3/3 Terms [amex.co/W4XhEH](https://amex.co/W4XhEH)

[@AmericanExpress #BuyActionCamPack](#)

Figure A2(b): Response message visible to a subset of the followers of the sender.

Figure A2: Messages with different levels of visibility.

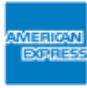

**American Express** ✓  
@AmericanExpress

Get Sony Action Cam for \$179.99+tax  
w/synced Amex Card. Tweet  
[#BuyActionCamPack](#) to start purch! QtyLtd Exp  
3/3 Terms [amex.co/W4XhEH](https://amex.co/W4XhEH)

Figure A3(a): Response message with Twitter handle prepopulated to the right of the cursor.

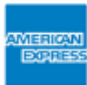

**American Express** ✓  
@AmericanExpress

Get Sony Action Cam for \$179.99+tax  
w/synced Amex Card. Tweet  
[#BuyActionCamPack](#) to start purch! QtyLtd Exp  
3/3 Terms [amex.co/W4XhEH](https://amex.co/W4XhEH)

Figure A3(b): Response message with Twitter handle prepopulated to the left of the cursor.

Figure A3: Messages with prepopulated Twitter handle.

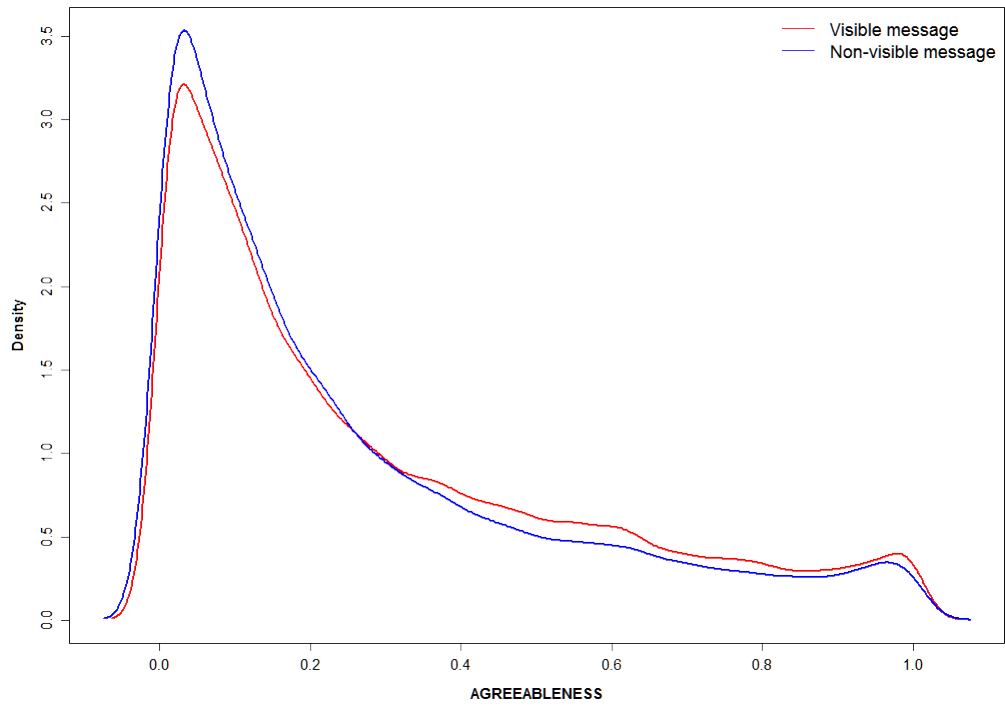

Figure A4: Distribution of level of Agreeableness in user personality on sets of users associated with visible (red) and non-visible (blue) messages.

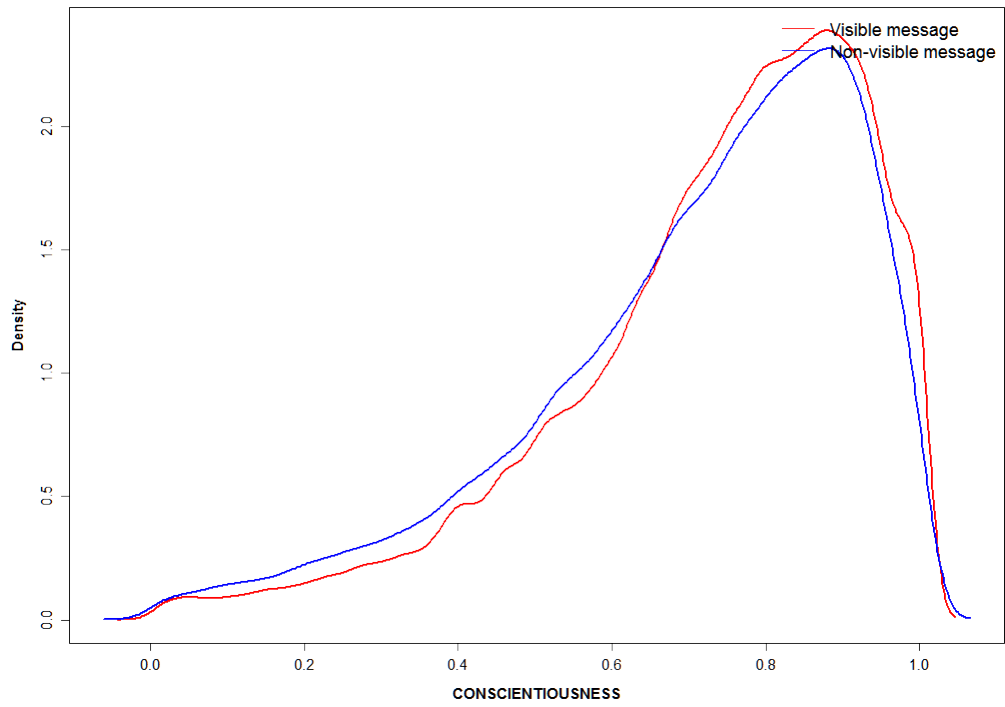

Figure A5: Distribution of level of Conscientiousness in user personality on sets of users associated with visible (red) and non-visible (blue) messages.

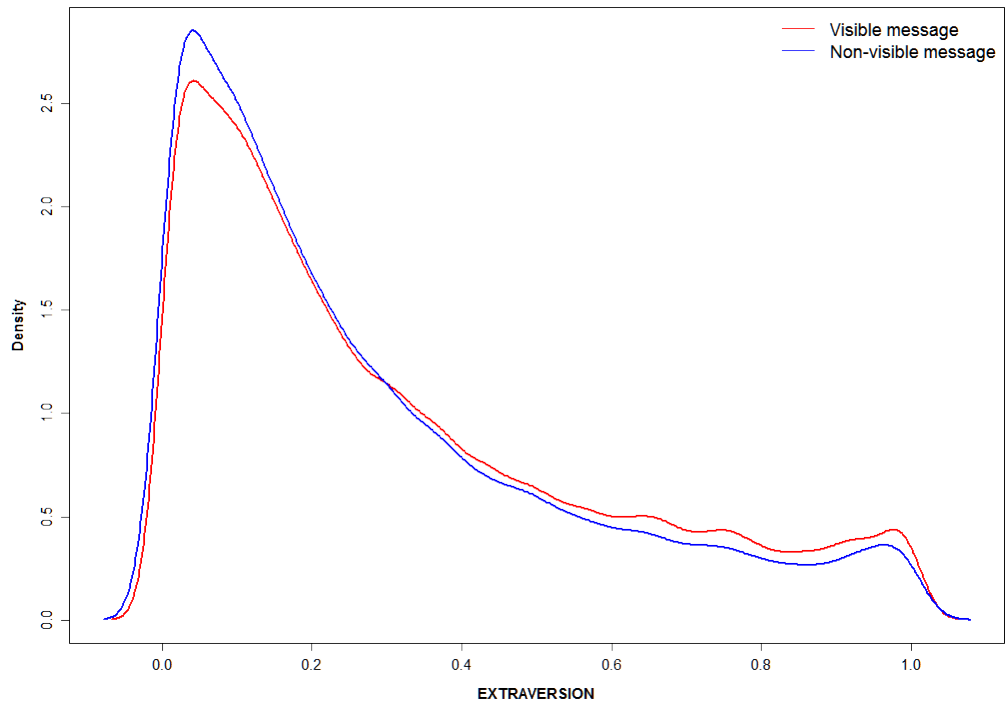

Figure A6: Distribution of level of Extraversion in user personality on sets of users associated with visible (red) and non-visible (blue) messages.

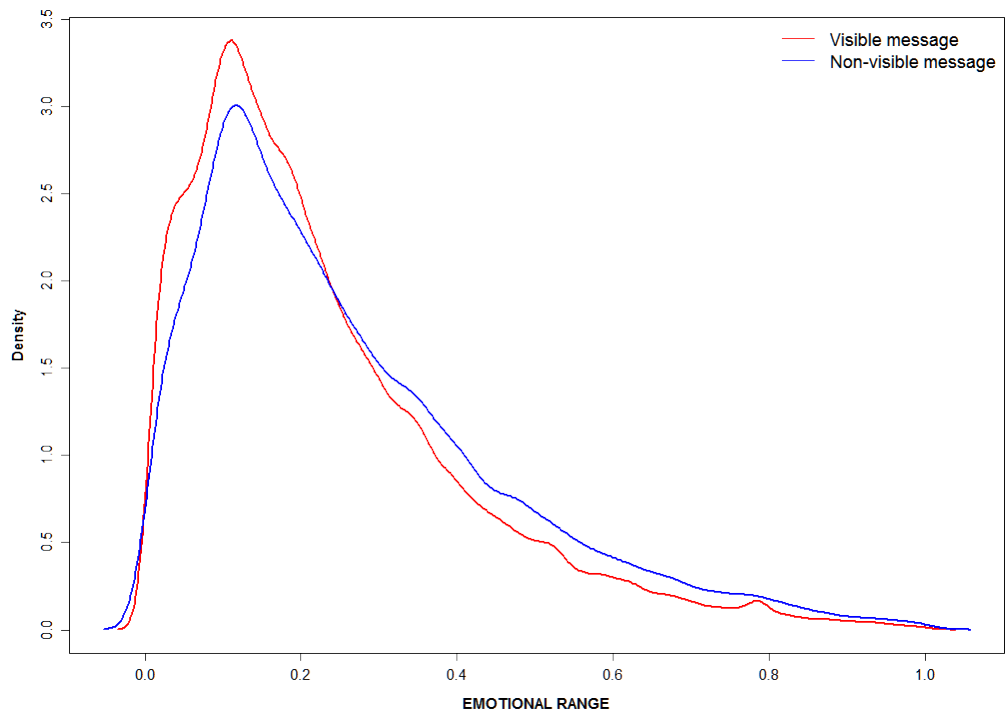

Figure A7: Distribution of level of Emotional range in user personality on sets of users associated with visible (red) and non-visible (blue) messages.

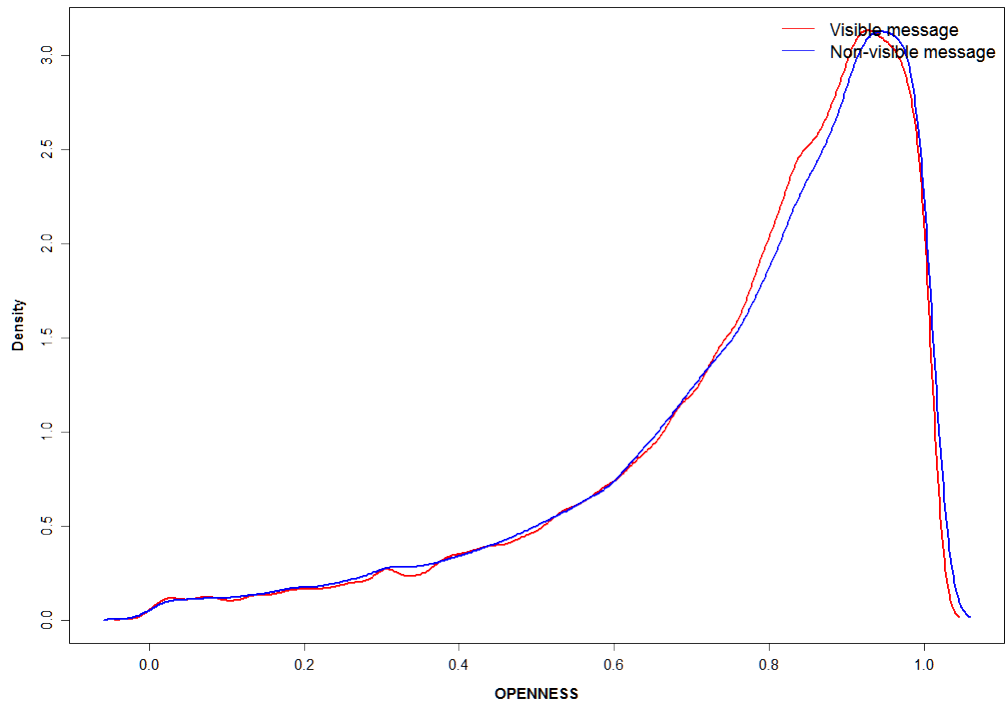

Figure A8: Distribution of level of Openness in user personality on sets of users associated with visible (red) and non-visible (blue) messages.

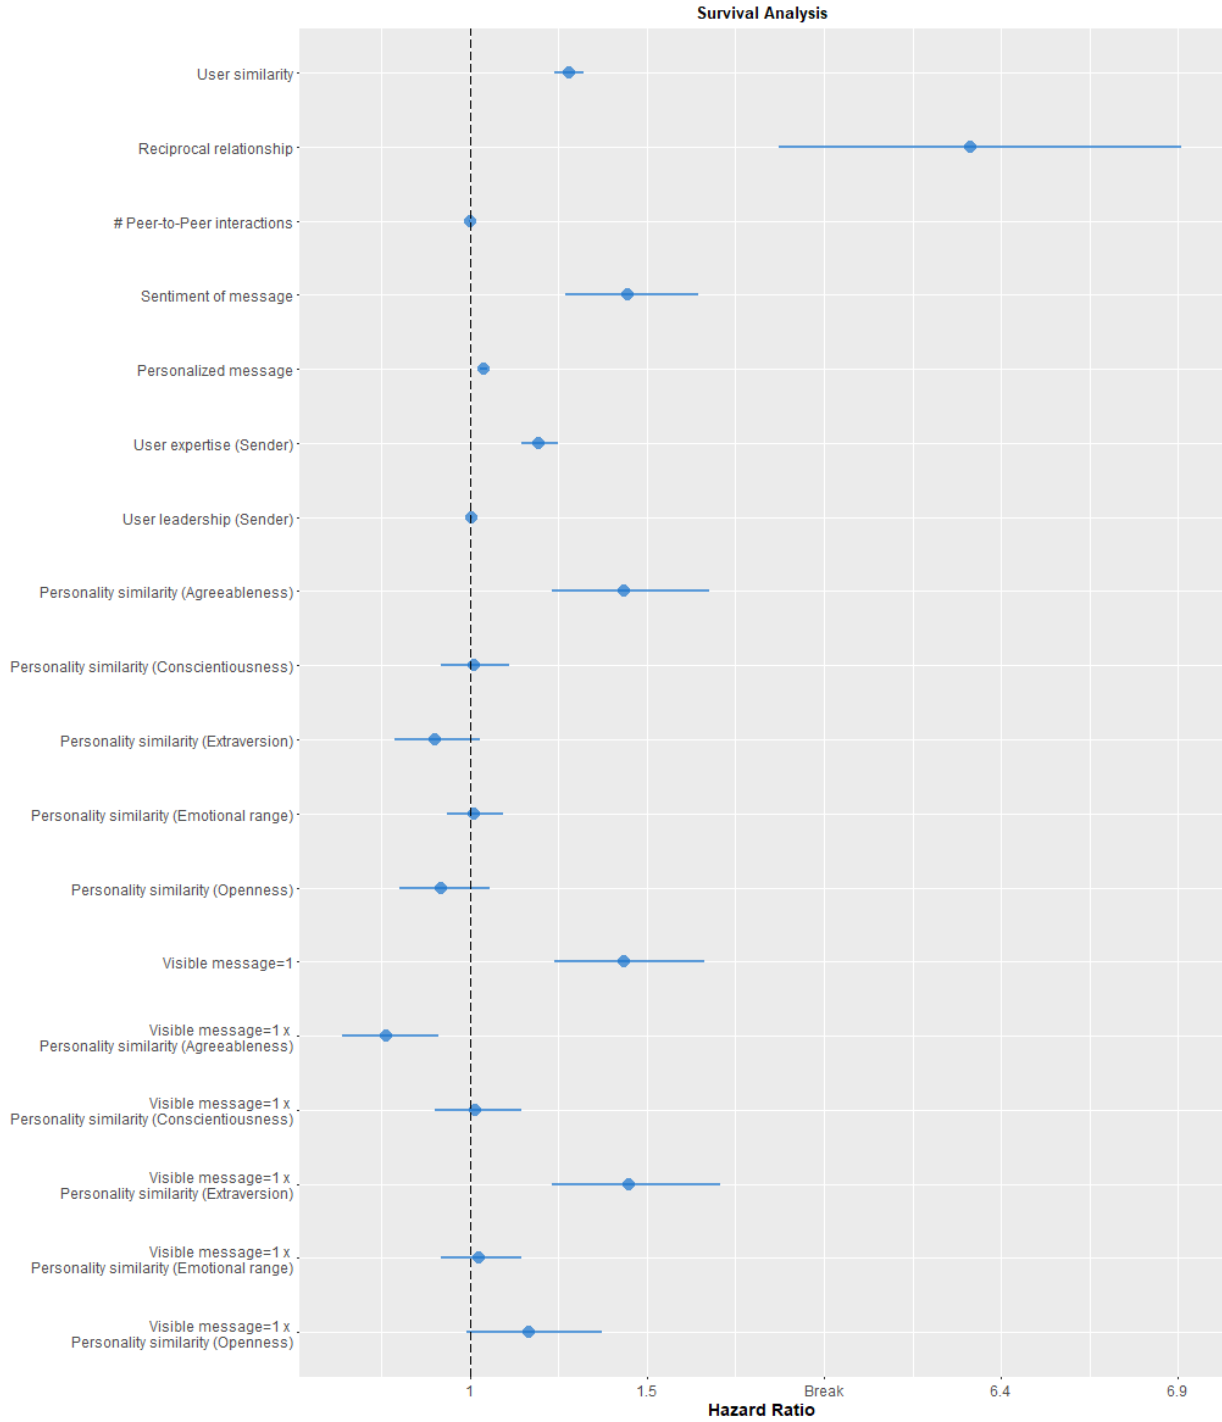

Figure A9: Effects of user attributes, dyadic user relationship characteristics, and user personality similarity on dyadic WOM effectiveness. Effects are shown with 95% confidence intervals (whiskers). The x-axis is discontinuous to better illustrate the effects of all the constructs. The figure displays hazard ratios (HRs) representing the percent increase ( $HR > 1$ ) or decrease ( $HR < 1$ ) in purchase hazards associated with each attribute. The econometric model controls for additional sender and recipient characteristics and product fixed effects.

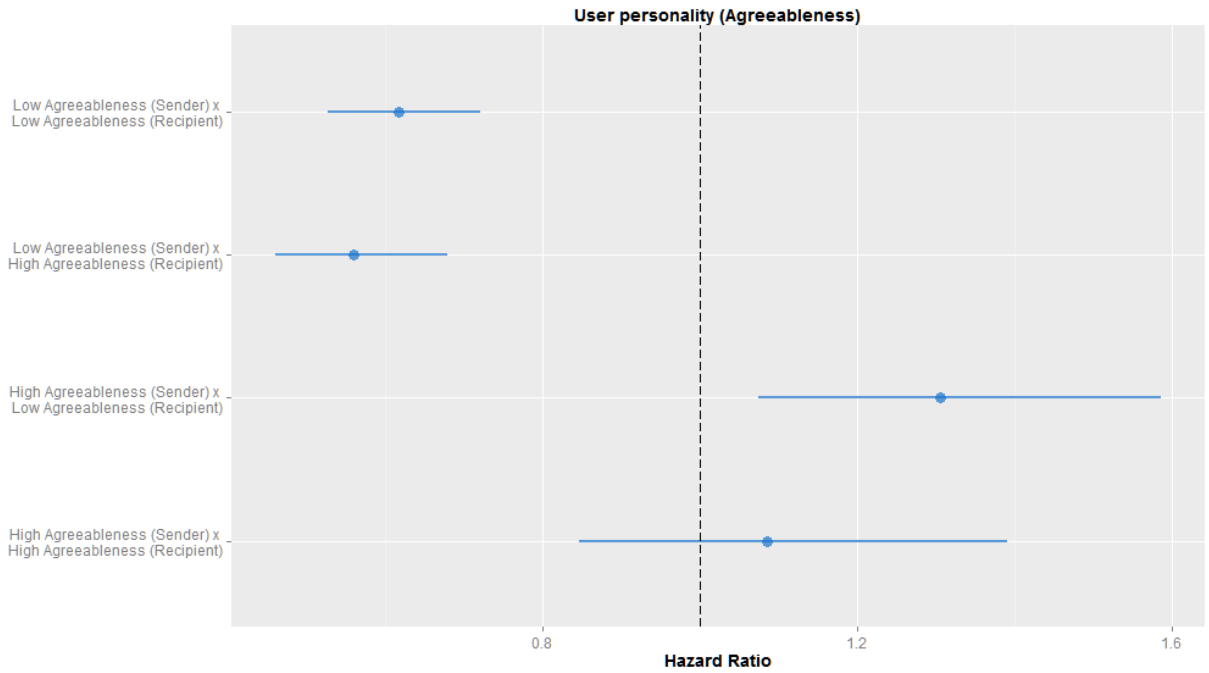

Figure A10: Effects of level of Agreeableness in user personality on dyadic WOM effectiveness. Effects are shown with 95% confidence intervals (whiskers). The figure displays hazard ratios (HRs) representing the percent increase ( $HR > 1$ ) or decrease ( $HR < 1$ ) in purchase hazards associated with each attribute.

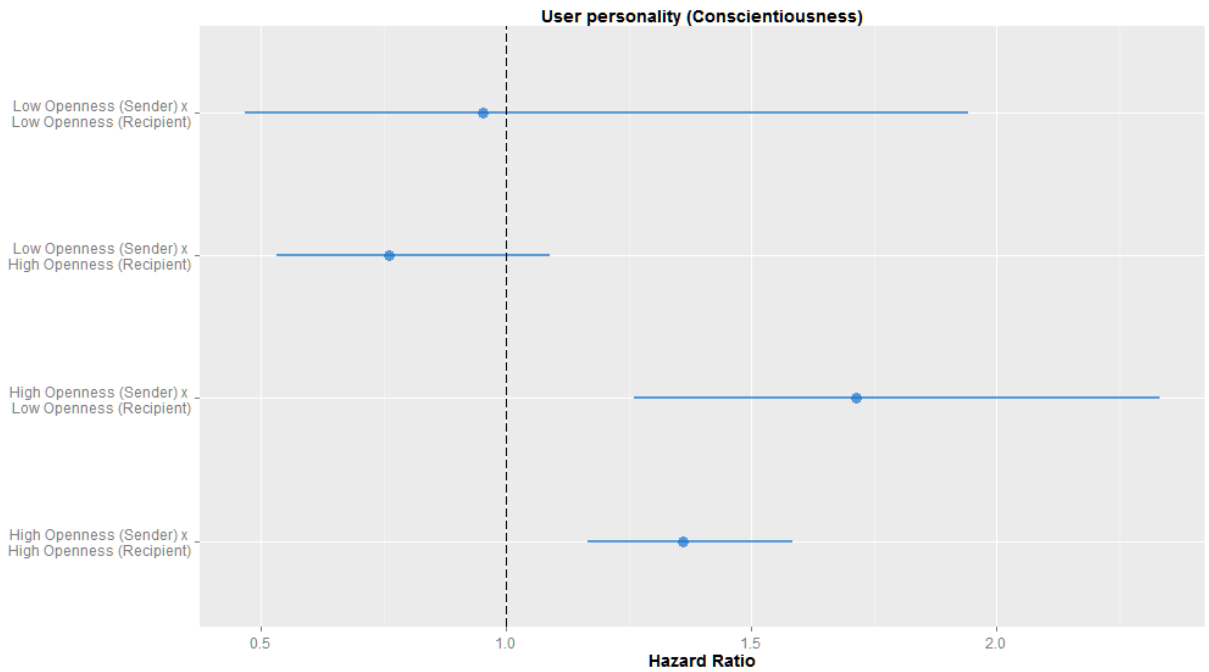

Figure A11: Effects of level of Conscientiousness in user personality on dyadic WOM effectiveness. Effects are shown with 95% confidence intervals (whiskers). The figure displays hazard ratios (HRs) representing the percent increase ( $HR > 1$ ) or decrease ( $HR < 1$ ) in purchase hazards associated with each attribute.

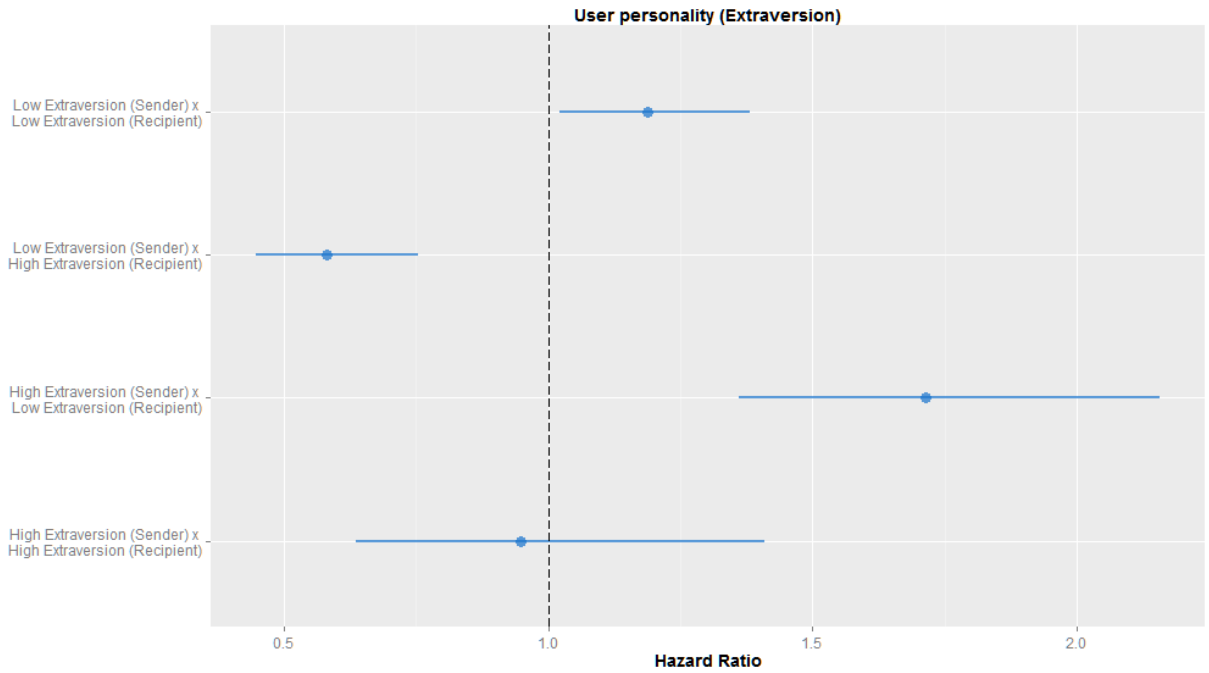

Figure A12: Effects of level of Extraversion in user personality on dyadic WOM effectiveness. Effects are shown with 95% confidence intervals (whiskers). The figure displays hazard ratios (HRs) representing the percent increase ( $HR > 1$ ) or decrease ( $HR < 1$ ) in purchase hazards associated with each attribute.

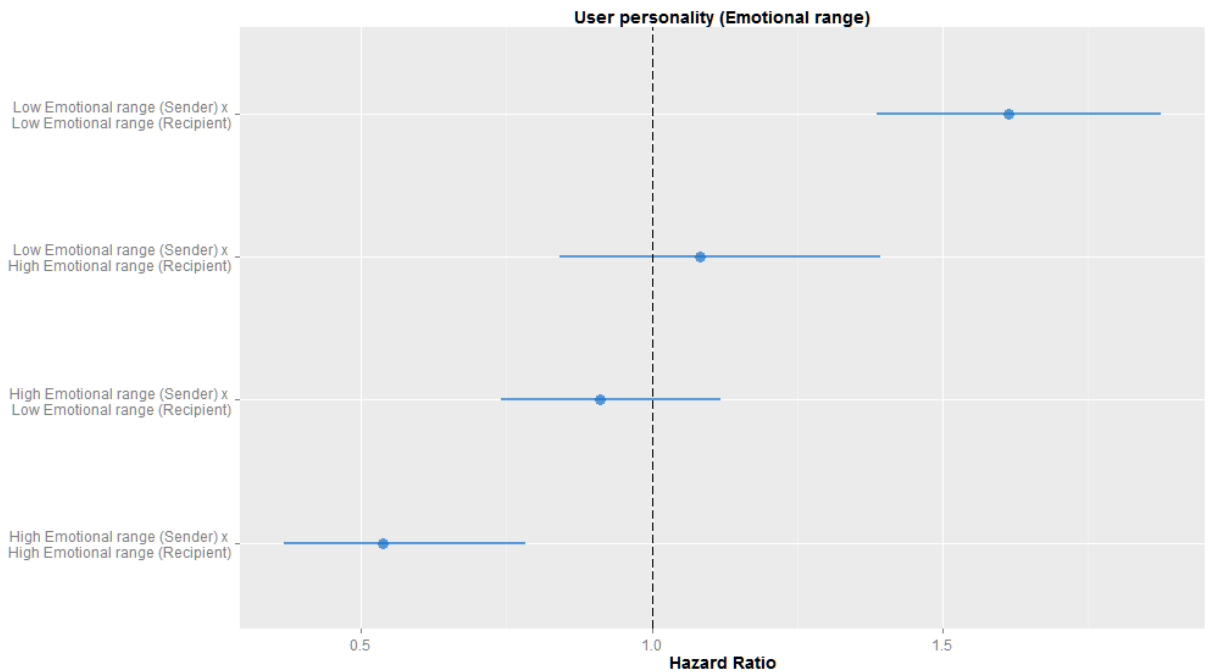

Figure A13: Effects of level of Emotional range in user personality on dyadic WOM effectiveness. Effects are shown with 95% confidence intervals (whiskers). The figure displays hazard ratios (HRs) representing the percent increase ( $HR > 1$ ) or decrease ( $HR < 1$ ) in purchase hazards associated with each attribute.

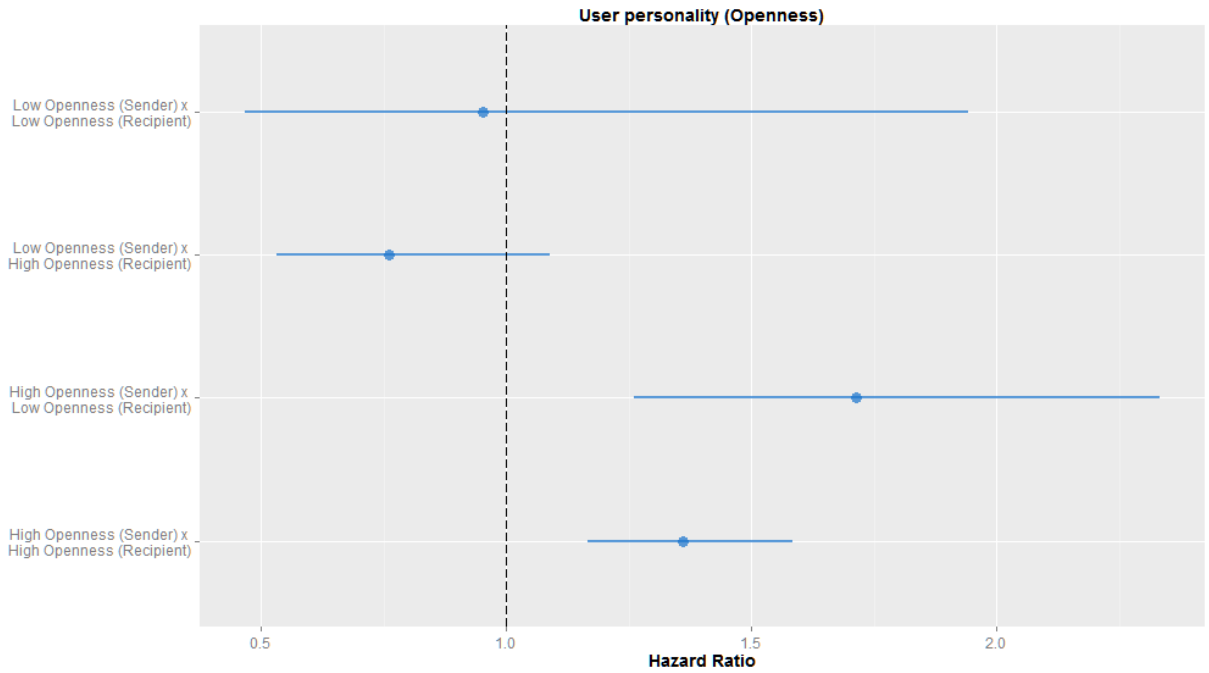

Figure A14: Effects of level of Openness in user personality on dyadic WOM effectiveness. Effects are shown with 95% confidence intervals (whiskers). The figure displays hazard ratios (HRs) representing the percent increase ( $HR > 1$ ) or decrease ( $HR < 1$ ) in purchase hazards associated with each attribute.
